## 1 **MiR-1253 Potentiates Cisplatin Response in Pediatric Group 3 Medulloblastoma by** 2 **Regulating Ferroptosis**

3 Ranjana K. Kanchan<sup>1</sup>, Naveenkumar Perumal<sup>1</sup>, Parvez Khan<sup>1</sup>, David Doss<sup>1,2</sup>, Ramakanth  
4 Chirravuri Venkata<sup>1</sup>, Ishwor Thapa<sup>3</sup>, Raghupathy Vengoji<sup>1</sup>, Jyoti B. Kaushal<sup>1</sup>, Jawed A.  
5 Siddiqui<sup>1</sup>, Mohd Wasim Nasser<sup>1</sup>, Surinder K. Batra<sup>1</sup>, and Sidharth Mahapatra<sup>1,4</sup>

6 <sup>1</sup> Department of Biochemistry, University of Nebraska Medical Center, Omaha, NE 68198, U.S.A

7 <sup>2</sup> School of Medicine, Creighton University, Omaha, NE 68178, USA

8 <sup>3</sup> School of Interdisciplinary Informatics, University of Nebraska at Omaha, Omaha, NE 68182,  
9 U.S.A.

10 <sup>4</sup> Department of Pediatrics, University of Nebraska Medical Center, Omaha, NE 68198, U.S.A.

11 **Corresponding author:** Sidharth Mahapatra, MD, PhD, Department of Pediatrics, University of  
12 Nebraska Medical Center, 601 South Saddle Creek Road, Omaha, Nebraska, email:  
13 [sidharth.mahapatra@unmc.edu](mailto:sidharth.mahapatra@unmc.edu)

14 **Author contributions:** RKK and SM conceptualized and designed the study. RKK, JBK and NP  
15 performed all experiments. PK developed ABCB7 knockout clone for the study. DD, RCV, and  
16 IT provided bioinformatics support for the study. SM coordinated and supervised data analysis.  
17 RKK wrote the first draft of the manuscript. NP, PK, DD, RCV, JAS, RV, MWN SKB and SM  
18 provided scientific feedback, critical reviews, and helped in revision of the manuscript. All  
19 authors have read and approved the final manuscript.

20 **Funding Information:** This work was supported by the National Institutes of Health (NICHD  
21 K12HD047349); the Edna Ittner Pediatric Research Support Fund; and the Team Jack Brain  
22 Tumor Foundation.

23 **Conflicts of Interest:** Authors declare that they have no competing interests.

24 **Abbreviations:** ABC, ATP binding cassette; ANOVA, analysis of variance; BLC-2, B-cell  
25 lymphoma 2; BRCA1, breast cancer gene 1; CB, cerebellum; CD276, cluster of differentiation  
26 276 (B7-H3); CDK6, cyclin-dependent kinase 6; c-Myc, c-myelocytomatosis oncogene; DDR,  
27 DNA damage repair; DCFDA, 2',7'-Dichlorofluorescein diacetate; DFO, deferoxamine; FACs,  
28 fluorescence-activated cell sorting; FISH, fluorescence *in situ* hybridization; GPX4, glutathione  
29 peroxidase 4; GSH, glutathione; GSS, glutathione synthetase; IC<sub>50</sub>, 50% inhibitory  
30 concentration; IHC, immunohistochemistry; i(17q), isochromosome 17q; KEGG, Kyoto  
31 encyclopedia of genes and genomes; KO, knock-out; LIP, labile iron pool; LPO, lipid  
32 peroxidation; MB, medulloblastoma; MDR, multiple drug resistance; miR, microRNA; miR-  
33 1253, microRNA 1253; MnTBAP, Mn(III)tetrakis(4-benzoic acid)porphyrin; mtROS,  
34 mitochondrial reactive oxygen species; MTT, 3-(4,5-dimethylthiazol-2-yl)-2,5-  
35 diphenyltetrazolium bromide; NC, negative control; NHA, normal human astrocytes; Non-  
36 SHH/WNT, non-Sonic Hedgehog/non-Wingless; PARP, poly ADP ribose polymerase; PCR,  
37 polymerase chain reaction; Ped, pediatric; PNET, primitive neuro-ectodermal tumor; ROS,  
38 reactive oxygen species; RSL3, RAS-selective lethal; SHH, Sonic Hedgehog; WNT, Wingless;  
39 XIAP, X-linked inhibitor of apoptosis; XTT, sodium 3'-[1-[(phenylamino)-carbonyl]-3,4-  
40 tetrazolium]-bis(4-methoxy-6-nitro)benzene-sulfonic acid hydrate

42 **Abstract**

43 Medulloblastoma (MB), the most common malignant pediatric brain tumor and a leading cause  
44 of childhood mortality, is stratified into four primary subgroups, WNT (wingless), SHH (sonic  
45 hedgehog), group 3, and group 4. Patients with group 3 tumors have the poorest prognosis. Loss  
46 of 17p13.3, which houses the tumor suppressor gene miR-1253, is a frequent high-risk feature of  
47 group 3 tumors.. In this study, we show that miR-1253 levels can disrupt iron homeostasis,  
48 induce oxidative stress and lipid peroxidation, triggering an iron-mediated form of cell death  
49 called ferroptosis. *In silico* and *in vitro* analyses of group 3 tumors revealed deregulation of  
50 ABCB7, a mitochondrial iron transporter and target of miR-1253, and GPX4, a critical regulator  
51 of ferroptosis. Restoration of miR-1253 levels in group 3 cell lines resulted in downregulation of  
52 ABCB7 and GPX4, consequently increasing cytosolic and mitochondrial labile iron pools,  
53 reducing glutathione levels, in turn, resulting in mitochondrial oxidative stress and lipid  
54 peroxidation. Together, these events accelerated cancer cell death. Treating miR-1253-  
55 expressing cancer cells with cisplatin potentiated cell death by further elevating oxidative stress,  
56 depleting glutathione levels, and augmenting lipid peroxidation, with added inhibitory effects on  
57 cell viability and colony formation. Treatment with a ferroptosis inhibitor (ferrostatin-1) lead to  
58 recovery from the cytotoxic effects of this combination therapy. Together, these findings reveal a  
59 novel role for miR-1253 in enhancing ferroptosis to attenuate group 3 tumor cell growth. Our  
60 studies provide a proof-of-concept for using miR-based therapeutics to augment current  
61 chemotherapeutics in high-risk tumors. Leveraging the tumor-suppressive properties of miRNAs  
62 as adjuncts to chemotherapy may provide a promising alternative to current therapeutic  
63 strategies.

64 **Key words:** ABCB7; ferroptosis; GPX4; medulloblastoma; miR-1253; ROS



## 66 **Introduction**

67 Of the primitive neuro-ectodermal tumors (PNET) afflicting the posterior fossa,  
68 medulloblastoma (MB) is the most common malignant tumor of childhood, accounting for 85%  
69 of PNETs and 20% of all posterior fossa tumors.[1-3] Based on high-throughput gene profiling  
70 studies, MBs are stratified into four major molecular subgroups: WNT, SHH, group 3 and group  
71 4.[4] Among these, patients with group 3 tumors suffer the worst prognosis (5-year overall  
72 survival <50%) due to a highly aggressive phenotype punctuated by c-Myc amplification,  
73 haploinsufficiency of chromosome 17p, presence of metastatic lesions at diagnosis, and high  
74 rates of recurrence.[4-10] Recurrence can further reduce 5-year overall survival to <10% and is  
75 partially fueled by the inability of young patients to tolerate effective chemo- and/or radiation  
76 therapy.[4, 11-13] For instance, systemic toxicity is an oft-cited justification for limitations in  
77 cisplatin dosing, especially for group 3 disease, leading to <20% of treated patients receiving an  
78 effective dose.[14-16] These facts underscore the urgent need to develop new strategies for high  
79 risk disease.

80 Recently, combining microRNAs with chemotherapy has garnered support in enhancing  
81 therapeutic efficacy via targeting critical regulators of DNA damage repair (DDR), apoptosis, or  
82 cell cycle.[17] In breast cancer, for example, miR-9 and miR-218 improved cisplatin  
83 responsiveness by targeting BRCA1 and impeding DNA damage repair.[18, 19] The miR-15  
84 family sensitized cisplatin-resistant cancer cells to apoptosis by targeting the G<sub>2</sub>/M cell cycle  
85 checkpoint.[20] In gastric and lung cancer cell lines, the miRNA cluster miR-200bc/429  
86 sensitized resistant cell lines to both vincristine and cisplatin by targeting BCL2 and XIAP.[21]  
87 In a gemcitabine-resistant pancreatic xenograft model, miR-205 delivered with gemcitabine in  
88 conjugated micelles resulted in significant tumor growth inhibition.[22] Most notably, miR-34a



89 replacement therapy (MRX34) has reached a phase 1 clinical trial (NCT01829971) in patients  
90 with primary unresectable or metastatic liver cancer.[23]

91 Group 3 tumors have amongst the highest frequency of cytogenetic aberrations targeting the  
92 short arm of chromosome 17 compared to the other subgroups, with punctuated incidence  
93 reported on locus 17p13.3.[24-27] We recently revealed strong tumor suppressive properties for  
94 miR-212 and miR-1253 which reside on locus 17p13.3.[27, 28] We showed that miR-1253  
95 directly targets the cell cycle checkpoint protein, CDK6, and CD276 (B7-H3), an immune  
96 checkpoint molecule implicated in tumor aggressiveness. [27, 29, 30] Aside from reducing tumor  
97 cell viability, migration/invasion, and colony formation, miR-1253 arrested cells at the G<sub>0</sub>/G<sub>1</sub>  
98 phase, activated apoptotic pathways, and triggered oxidative stress.[27] Numerous studies have  
99 recapitulated these strong tumor suppressive properties in various cancers, including non-small  
100 cell lung carcinoma[31], osteosarcoma[32], pancreatic cancer[33], male breast cancer[34], and  
101 colon cancer[35].

102 Of interest, the ATP-binding cassette (ABC) family of transporters are known to confer  
103 multi-drug resistance to a number of tumor types.[36, 37] These ABC transporters are amongst  
104 the novel targets of miR-1253. In metastatic breast cancer, for example, miR-1253 was shown to  
105 inhibit the drug efflux pump, ABCB1, thereby potentiating the cytotoxicity of doxorubicin.[38]  
106 However, this particular ABC transporter is not amongst the deregulated ABC transporters  
107 reported in group 3 MB.[39] Another putative target of miR-1253 is ABCB7, an iron transporter  
108 residing on the inner mitochondrial membrane involved in iron homeostasis and Fe-S cluster  
109 biogenesis.[40] Deregulation of ABCB7 has been shown to help cancer cells withstand apoptosis  
110 and ferroptosis.[41] Ferroptosis is a form of cell death triggered by iron-mediated oxidative  
111 stress leading to lethal lipid peroxidation. This process is tightly controlled by glutathione

112 peroxidase 4 (GPX4), whose primary substrate is the anti-oxidant, glutathione (GSH).[42-44]  
113 Recent studies have identified ferroptosis mitigation in tumor progression and drug  
114 resistance.[45, 46]

115 Of the standard chemotherapeutic agents used in the treatment of MB, cisplatin, a platinum-  
116 based agent that induces DNA damage, has been shown to trigger cell death via oxidative stress  
117 and ferroptosis.[45, 47] Whether deregulation of ABCB7 leads to cisplatin resistance in group 3  
118 tumors or if miR-1253 can sensitize cisplatin response through inhibition of ABCB7 remains  
119 unstudied. Thus, we hypothesized that by targeting and inhibiting ABCB7, miR-1253 can induce  
120 iron imbalance, oxidative stress, and trigger ferroptosis also potentiating the cytotoxicity of  
121 cisplatin in group 3 MB.

122

## 123 **Materials and Methods**

### 124 **Patient Samples**

125 Formalin fixed paraffin embedded tissue blocks and frozen tissues of normal cerebellum  
126 (pediatric=12, adult=5) and pediatric MB specimens (WNT=1, SHH=9, grp 3=11, grp 4=16,  
127 unknown=7) were obtained from the Children's Hospital and Medical Center, Omaha and the  
128 University of Nebraska Medical Center after Institutional Review Board approval. Informed  
129 consent was not required since the status of the study was exempted. For expression profiles of  
130 ABCB7 and GPX4, we cross-analyzed two primary MB datasets (Kanchan *et al.*, GSE148390  
131 and Weishaupt *et al.*, GSE124814).[48-50] For Spearman correlation, we used GSE148390. For  
132 Kaplan-Meier Survival Analysis, we used the R2 database (Cavalli *et al.*, GSE85217).[9]

### 133 **Cell Lines and Cell Culture**

134 D283 and D341 were purchased from ATCC (Manassas, Virginia); D425 and D556 were kind  
135 gifts from Darell Binger (Duke University Medical Center, Durham, NC); HDMB03 cells were a  
136 kind gift from Till Milde (Hopp Children's Tumor Center, Heidelberg, Germany). Cell line  
137 genotyping was verified using short tandem repeat (STR) DNA profiling (UNMC). D283, D341,  
138 D425 and D556 cell line were maintained in DMEM supplemented with 10%-20% FBS and  
139 100µg/ml penicillin/streptomycin. Normal human astrocytes (NHA) were purchased from Lonza  
140 Bioscience (Walkersville, MD) and grown in ABM basal medium supplemented with growth  
141 factors (Lonza Biosciences). All cell lines were maintained in 95% humidity, 37°C, 5% CO<sub>2</sub>.

### 142 **Transient Transfections**

143 Cells at a density of  $0.5 \times 10^6$  were seeded in 6-well plates for 24 h and subsequently serum  
144 starved for 4 h prior to transfection. Cells were transfected with miR-1253 mimic (miRVanaTM

145 miRNA mimic, ThermoFisher, 100 nM) or scramble negative control (100 nM) with  
146 Lipofectamine 2000 (Invitrogen) for 24 h.

### 147 **CRISPR/Cas9 Knockouts**

148 Lentiviral particles were prepared by transfection of plasmid expressing Cas9 or sgRNA of  
149 ABCB7 (Addgene) co-transfected with pCMV-dR8.2 dvpr (Addgene) and pCMV-VSV-g  
150 (Addgene) lentiviral packaging plasmids into HEK293T cells using polyethyleneimine (PEI)  
151 transfection reagent. Virus-containing supernatant was collected and filtered 48 h after  
152 transfection. HDMB03 cells in 6-well plates were infected with Cas9 viral supernatant  
153 containing 4 µg/mL polybrene. Following blasticidin selection (10 µg/ml), the expression of  
154 Cas9 was confirmed by Western blotting. Stable HDMB03 cells expressing Cas9 expression  
155 were infected with the ABCB7 sgRNA viral supernatant containing 4 µg/ml polybrene. After 24  
156 h of infection, cells were selected with 0.5 µg/ml puromycin. Single cell clones with Cas9  
157 expression and ABCB7 knockout were amplified and used for subsequent experiments.

### 158 **Cell Viability**

159 After transfection, HDMB03 cells ( $5 \times 10^3$  cells/well) were re-seeded into 96-well plates and  
160 treated with defined concentrations of cisplatin (1-50 µM) for 24-72 h. Subsequently, MTT (5  
161 mg/mL) or XTT (0.3 mg/mL) was added to each well and incubated for 2 or 6 h, respectively, at  
162 37 °C. MTT absorbance was measured at 570 nm; XTT absorbance was measured at 440 nm.  
163 Data were analyzed using the SOFTMAX PRO software (Molecular Devices Corp., Sunnyvale,  
164 CA, USA).

### 165 **Colony Formation**

166 After transfection, HDMB03 cells ( $1 \times 10^3$  cells/well) were re-seeded in 6-well plates. Cells were  
167 treated with cisplatin (2 µM) and grown in complete medium for 9 days. Colonies were stained

168 with 0.25% crystal violet (dissolved in 50% methanol) for 30 min. Crystal violet was dissolved  
169 in 10% acetic acid and absorbance read at 590 nm.

### 170 **Luciferase Assay**

171 Luciferase assay was performed as previously described.[27] Primers ABCB7 Forward: 5'-  
172 TAAGCCTGACATAACGAGGA-3'; ABCB7 Reverse: 5'-GCATCTCAGTATTA ACTCTAGC  
173 -3') were purchased from Eurofins. 3'UTR Wild and 3'UTR-Mutant were incorporated into  
174 XbaI restriction site of PGL3-control vector (Promega) expressing firefly luciferase. Dual  
175 luciferase assay was done in HDMB03 cells ( $3 \times 10^5$  cells/well) in 12-well plates. Luciferase  
176 activity was the measured using Dual-Luciferase Reporter Assay System (Promega) with a  
177 Luminometer (Biotek).

### 178 **Calcein AM Staining**

179 Calcein-acetoxymethyl ester (Calcein AM) is a membrane permeable, non-fluorescent dye which  
180 emits green fluorescence once internalized into the live cells and cleaved by cytoplasmic  
181 esterase. Although calcein fluorescence is stable, it can be quenched by divalent metal ions such  
182 as iron and cobalt. To estimate cytosolic labile iron pool (LIP), HDMB03 and D425 cells were  
183 either transfected with scramble or miR-1253 or had ABCB7 knocked down. Cells were reseeded  
184 on to glass coverslips treated with or without the iron chelator deferoxamine (DFO) for 6 h. Cells  
185 were washed twice with 0.5 ml of PBS and incubated with 0.05  $\mu$ M Calcein AM for 15 min at 37  
186  $^{\circ}$ C. Cells were analyzed under confocal microscope. Ex/Em = 488 nm/525 nm.

### 187 **Detection of Cytosolic and Mitochondrial Fe<sup>2+</sup>**

188 Scramble vs. miR-1253-transfected cells or wild-type vs. ABCB7<sup>KO</sup> cells were seeded onto glass  
189 coverslips and were treated with or without DFO (100  $\mu$ M) for 6 h. For cytosolic LIP, 1  $\mu$ mol/L  
190 FerroOrange (Dojindo, Japan) and 100 nM MitoTraker<sup>TM</sup> Deep Red FM were added to each

191 well; for mitochondrial LIP, 1  $\mu$ M/L Mito-FerroGreen (Dojindo, Japan) and 100 nM MitoTracker  
192 Deep Red FM were added to each well. Cells were incubated in a 37° C incubator equilibrated  
193 with 95% air and 5% CO<sub>2</sub> for 30 min. After incubation cells were washed and counter-stained  
194 with 4',6-diamidino-2-phenylindole (DAPI). Cells were observed under a confocal fluorescence  
195 microscope, Ex/Em<sub>cytosolicLIP</sub> = 561 nm/570-620 nm, Ex/Em<sub>mitochondrialLIP</sub> = 488 nm/500-550 nm.

### 196 **Measurement of Intracellular Oxidative Stress**

197 Intracellular ROS (H<sub>2</sub>O<sub>2</sub>) was measured using oxidation-sensitive fluorescent probe 2',7'-  
198 Dichlorofluorescein diacetate (DCFDA) (Sigma Aldrich, USA); mitochondrial O<sub>2</sub><sup>•-</sup> was measured  
199 using MitoSOX™ Red (Thermofisher, USA). Scramble vs. miR-1253-transfected cells or wild-  
200 type vs. ABCB7<sup>KO</sup> cells were treated with cisplatin or cisplatin and Ferrostatin-1 (Apexbio,  
201 USA) for 24 h. Cells were incubated with 10  $\mu$ M DCFDA or 5  $\mu$ M MitoSOX™ Red for 30 min.  
202 Oxidized DCFDA and MitoSOX™ Red were measured using at Ex/Em ~485/528 nm and  
203 Ex/Em ~510/580, respectively.[51] Images were captured using EVOS FL Auto Imaging System  
204 (EVOS FL Auto, Life Technologies). Oxidized DCFDA and MitoSOXRed were measured using  
205 multimode plate reader at Ex/Em ~485/528 nm and Ex/Em ~510/580, respectively

### 206 **Measurement of Lipid Peroxidation**

207 The Image-iT® LPO kit was used to measure lipid ROS through oxidation of the C-11-  
208 BODIPY® 581/591 sensor according to the manufacturer's instructions. Briefly, scramble vs.  
209 miR-1253-transfected cells or wild-type vs. ABCB7<sup>KO</sup> cells were treated with or without  
210 cisplatin or a combination of cisplatin and Ferrostatin-1 for 24 h. Cells were then stained with  
211 Image-iT® Lipid Peroxidation Sensor (10  $\mu$ M) for 30 min and counter-stained with DAPI.  
212 Images were captured by confocal microscopy.

### 213 **Ferroptosis Assessment by Flow Cytometry**

214 Scramble and miR-1253-transfected cells were treated with or without cisplatin or a combination  
215 of cisplatin and Ferrostatin-1 for 24 h. After completion of treatment, cells were incubated with 5  
216  $\mu\text{M}$  of MitoSOX<sup>TM</sup> Red for 30 min. Cells were washed and stained with Annexin-V/Cy<sup>TM</sup>5(BD  
217 Biosciences). Cell populations were sorted and measured by flow cytometry.

### 218 **Glutathione Estimation**

219 Glutathione estimation was performed according to the manufacturer's instructions using GSH-  
220 Glo<sup>TM</sup> Glutathione Assay kit (Promega, USA). Briefly, scramble vs. miR-1253-transfected cells  
221 or wild-type vs. ABCB7<sup>KO</sup> cells were seeded ( $5 \times 10^3$  cells/well) in the 96-well plates. Cells were  
222 treated with or without cisplatin or in combination with cisplatin and Ferrostatin-1 for 24 h.  
223 Plates were incubated in the dark for 30 min on a plate shaker with 100  $\mu\text{l}$  of prepared 1x GSH-  
224 Glo<sup>TM</sup> Reagent. Then, 100  $\mu\text{l}$  of reconstituted Luciferin Detection Reagent was added to each  
225 well and incubated in the dark for another 15 min. A standard curve was prepared using GSH  
226 standard solution to facilitate the conversion of luminescence to GSH concentration.

### 227 **Immunofluorescence Imaging**

228 In cultured cells: scramble vs. miR-1253-transfected cells or wild-type vs. ABCB7<sup>KO</sup> cells were  
229 seeded onto coverslips, rinsed, and fixed using 4% paraformaldehyde (PFA) in PBS for 10 min  
230 at room temperature. Cells were washed, incubated with 0.25% Triton X-100, and blocked with  
231 3% BSA at room temperature. Cells were then incubated with primary antibody ABCB7 or  
232 COXIV overnight. Following day, cells were incubated with Alexafluor 488 and Alexafluor 547  
233 conjugated antibodies for 1 h. Cells were washed and counter stained with DAPI. Images were  
234 captured at 63X using Carl Zeiss microscope (LSM 800 META).

235 In tissue: immunofluorescence was performed on surgically-resected, formalin-fixed, paraffin-  
236 embedded sections of group 3 medulloblastomas. Deparaffinized tissue sections were blocked

237 with 5% BSA after heat induced epitope retrieval with citrate buffer (pH 6.0) and then incubated  
238 with primary antibodies, ABCB7 rabbit monoclonal antibody (1:200), GPX4 rabbit monoclonal  
239 antibody, or COXIV mouse monoclonal antibody (1:200). Following overnight incubation with  
240 primary antibody, sections were incubated for 1 h with Alexa-488 or Alexa-547-conjugated,  
241 mouse and rabbit secondary antibodies (1:200). Sections were counter-stained with DAPI.  
242 Micrographs were captured at 20X using Carl Zeiss microscope (LSM 800 META).

### 243 **PCR Primers**

244 Total RNA extraction and quantitative PCR (qPCR) were performed according to manufacturer  
245 protocol. The forward (F) and reverse (R) primer sequences were as follows: ABCB7 (F): 5'-  
246 AAGATGTGAGCCTGGAAAGC-3' (R): 5'- AGAGGACAGCATCCTGAGGT-3'; GPx4 (F):  
247 5'-ACAAGAACGGCTGCGTGGTGAA-3' (R): 5'-GCCACACACTTGTGGAGCTAGA-3';  $\beta$ -  
248 Actin (F): 5'-CACCATTGGCAATGAGCGGTTC-3'(R): 5'-  
249 AGGTCTTTGCGGATGTCCACGT-3'.

### 250 **Statistical Analysis**

251 Data are presented as mean  $\pm$  SD. All experiments were conducted at least in duplicates with 3-6  
252 replicates per experiment. Statistical analyses were performed using Prism 9.2 (GraphPad  
253 Software). Differences between groups were compared using Student's t-test or one-way analysis  
254 of variance (ANOVA). Statistical significance was established at  $*p < 0.05$ ;  $**p < 0.01$ ;  $***p$   
255  $< 0.001$ ;  $****p < 0.0001$ . Statistical analyses of high-throughput sequencing data were performed  
256 using R Statistical Software v4.1.1 (R Core Team), expression values were compared using a  
257 Mann-Whitney  $U$  test.

258



259 **Results**

260 **ABCB7, a novel target of miR-1253, is deregulated in group 3 medulloblastomas.**

261 In our previous study, we identified miR-1253 as a novel tumor suppressor gene in MB and  
262 its multiple oncogenic targets.[27] Here, we sought to determine other targets of miR-1253,  
263 especially those that may regulate drug sensitivity in MB. Upon restoration of miR-1253, using  
264 transient overexpression in HDMB03 cells, we observed potent negative regulation of the ABC  
265 transporter superfamily by KEGG pathways and RNA Sequencing analyses (**Supplementary**  
266 **Figures 1A and 1B**). We wanted to then isolate specific targets of miR-1253 relevant to group 3  
267 MB pathophysiology and/or aggressiveness. We began by identifying ABC transporters  
268 deregulated in group 3 MB (**Supplementary Figure 1C**, column 1). From this list, we isolated  
269 transporters whose deregulated expression in group 3 MB conferred poor prognosis  
270 (**Supplementary Figure 1C**, column 2, **red**). Within this cohort, we examined transporters  
271 whose expression was negatively impacted by stable miR-1253 overexpression in HDMB03  
272 cells (**Supplementary Figure 1C**, column 3). This comparative analysis revealed ABCB7 as the  
273 best putative miR-1253 target for further study.

274 We first learned that ABCB7 was in fact deregulated in multiple MB cohorts with high  
275 expression conferring a poor prognosis (**Supplementary Figures 1D and 1E**). By comparing  
276 subgroup-specific ABCB7 expression in 3 recent MB cohorts, we identified consistent  
277 deregulation of ABCB7 in group 3 tumors (**Figure 1A and Supplementary Figure 1F and 1G**).  
278 We further observed a strong association of ABCB7 deregulation with tumor aggressiveness,  
279 impacting overall survival of group 3 MB patients (**Figure 1B**). Next, we confirmed high  
280 expression of ABCB7 in our local cohort of group 3 tumors and its co-localization within the  
281 inner mitochondrial membrane as evidenced by COXIV staining by confocal microscopy

282 **(Figure 1C)**. Additionally, we confirmed relatively high expression of ABCB7 in a panel of  
283 aggressive group 3 MB cell lines when compared to normal human astrocytes **(Figure 1D)**.

284 To demonstrate ABCB7 targeting by miR-1253, we first showed translational repression via  
285 Western blotting in 2 group 3 MB cell lines, D425 **(Figure 1E)** and HDMB03 **(Figure 1F)**. In  
286 the same cell lines, confocal imaging showed both localization of ABCB7 to the inner  
287 mitochondrial membrane and visualized the effects of miR-1253 expression on ABCB7  
288 expression inhibition, as evidenced by a dramatically reduced green fluorescence **(Figure 1G)**.  
289 Finally, we showed direct binding of miR-1253 to ABCB7 via a dual-luciferase reporter assay  
290 **(Figures 1H)**. Taken together, these data confirmed ABCB7 as a direct target of miR-1253 and  
291 strongly implicated its deregulation as a poor prognostic marker specific to group 3 MB.

### 292 **MiR-1253 triggers iron imbalance and oxidative stress leading to cell death in group 3 MB** 293 **cell lines.**

294 ABCB7 plays a critical role in maintaining intracellular iron stores.[52] Residing on the  
295 inner mitochondrial membrane, it homodimerizes to deliver Fe-S clusters synthesized within the  
296 mitochondria to the cytoplasm.[52-54] To determine the effect of ABCB7 inhibition via miR-  
297 1253 on iron homeostasis, we studied accumulation of free ferrous iron ( $\text{Fe}^{2+}$ ) within the  
298 mitochondria and the cytosol in miR-1253-transfected cells. Calcein AM is a membrane  
299 permeable dye which produces green fluorescence when internalized and can be rapidly  
300 quenched by divalent metals (iron, cobalt, cadmium). MiR-1253 expression in D425 and  
301 HDMB03 cells led to quenching of Calcein AM dye when compared with untransfected cancer  
302 cells **(Figure 2A and 2B)**.

303 We further compared the fluorescence of FerroOrange (specific for cytosolic  $\text{Fe}^{2+}$ )[55] and  
304 Mito-FerroGreen (specific for mitochondrial  $\text{Fe}^{2+}$ )[56] in these systems and observed an increase

305 in fluorescence intensity for both in miR-1253-transfected HDMB03 cells as compared to  
306 untransfected control cells (**Figure 2C**). Treatment with an iron chelator, deferoxamine (DFO),  
307 reduced fluorescence to normal levels in these cells, substantiating the generation of a labile iron  
308 pool in both the mitochondria and cytoplasm with miR-1253 expression.

309 Disrupting iron homeostasis can lead to excessive reactive oxygen species (ROS) generation  
310 by the Fenton reaction, targeting cellular lipids, proteins, and nucleic acids, eventuating in  
311 cellular damage and death.[57, 58] Superoxide ( $O_2^{\bullet -}$ ) and hydrogen peroxide ( $H_2O_2$ ) are the  
312 major species generated by the mitochondria during oxidative phosphorylation.[59] To  
313 investigate the consequence of triggering free ferrous iron accumulation, we measured  
314 mitochondrial and cytosolic ROS (MitoSOX<sup>TM</sup> RED and DCFDA, respectively) and subsequent  
315 lipid peroxidation in miR-1253-transfected cells. Both mitochondrial  $O_2^{\bullet -}$  and cytosolic  $H_2O_2$   
316 levels increased significantly in miR-1253-transfected D425 (**Figure 3A**) and HDMB03 (**Figure**  
317 **3B**) cells. This was concurrent with an increase in lipid peroxidation in miR-1253-transfected  
318 cell lines (**Figures 3C and 3D**).

319 Ferroptosis is defined as an iron-dependent form of regulated cell death resulting from lipid  
320 peroxidation.[42] Given our observations with iron accumulation, ROS generation, and lipid  
321 peroxidation, we wanted to assess whether miR-1253 can, in fact, trigger ferroptosis. D425 and  
322 HDMB03 cells transfected with miR-1253 were stained with MitoSOX<sup>TM</sup> Red (for  $O_2^{\bullet -}$ ) and  
323 Annexin-V/Cy<sup>TM</sup>5 (marker of apoptotic cell death). Flow cytometry analysis revealed a  
324 significant (~3-fold) rise in dual-stained cells (Q2) indicating oxidative stress-mediated cell  
325 death (**Figure 3E and 3F**). Collectively, our findings revealed that miR-1253 can trigger iron  
326 accumulation within the mitochondria and cytosol, resulting in oxidative stress and lipid  
327 peroxidation, eventually leading to cell death by ferroptosis.

328 **Knocking out ABCB7 can also trigger iron imbalance and oxidative stress in group 3 MB**  
329 **cell lines.**

330 Given the central role ABCB7 plays in iron homeostasis, we conducted similar studies in  
331 ABCB7<sup>KO</sup> HDMB03 cells. First, we generated the knockout (KO) cell line using CRISPR/Cas9  
332 technology (**Figure 4A** and **4B**). As prior, we studied iron imbalance via Calcein AM dye  
333 quenching and FerroOrange and Mito-FerroGreen fluorescence via confocal microscopy. As  
334 expected, we recapitulated findings from miR-1253-transfected cancer cells in ABCB7<sup>KO</sup> cells  
335 (**Figures 4C-F**). Together, these studies confirmed that the miR-1253-mediated induction of  
336 ferroptosis was strongly contributed by ABCB7 targeting.

337 **MiR-1253 and ABCB7 influence GPX4 expression, a key regulator of ferroptosis.**

338 Glutathione (GSH) serves as a cell's primary antioxidant, capable of binding to Fe<sup>2+</sup> to  
339 prevent iron-mediated oxidative stress.[42, 60] It also serves as the main substrate for glutathione  
340 peroxidase 4 (GPX4), a critical player in the elimination of toxic lipid peroxides engendered  
341 from oxidative stress that can trigger ferroptosis (**Figure 5A**). In patients with cancer, GPX4 is  
342 often deregulated, purportedly by epigenetic mechanisms, and has been shown to correlate not  
343 only with poor prognosis but also increased drug resistance. Consequently, inhibition of GPX4  
344 by RAS-selective lethal 3 (RSL3) was noted to sensitize lung cancer cells to cisplatin.[47]  
345 Similarly, in neuroblastoma, withaferin A induced ferroptosis and tumor growth suppression by  
346 inhibiting GPX4.[61]

347 In MB, we noted a significant deregulation of GPX4 in all tumor subtypes, with the highest  
348 expression noted in group 3 MB (**Figure 5B** and **Supplementary Figure 2**); prognosis in high-  
349 expressing patients was poor (**Figure 5C**). Immunofluorescence studies revealed high expression  
350 of GPX4 in group 3 MB and co-localization of GPX4 to the mitochondria (**Figure 5D**). In

351 classic group 3 MB cell lines, GPX4 expression was significantly elevated compared to normal  
352 human astrocytes (**Figure 5E**).

353 We then studied the influence of miR-1253 and ABCB7<sup>KO</sup> on GPX4 levels. As  
354 demonstrated, GPX4 levels were reduced in miR-1253-expressing D425 and HDMB03 cells  
355 (**Figure 5F**). Notably, with ABCB7<sup>KO</sup>, GPX4 expression was almost completely abrogated.  
356 Similarly, we noted a positive Pearson correlation ( $R=0.43$ ,  $p =0.023$ ) between GPX4 and  
357 ABCB7 (**Figure 5G**). GSH, a main substrate of GPX4, was concurrently reduced in miR-1253-  
358 overexpressing D425 and HDMB03 cells (**Figure 5H**). Together, these findings revealed the  
359 effects of miR-1253 on GPX4 regulation and GSH levels in its contribution to ferroptosis.

#### 360 **Restoration of miR-1253 potentiates cisplatin cytotoxicity in group 3 MB cell lines.**

361 Cisplatin, a platinum-containing chemotherapeutic agent, induces DNA damage via various  
362 mechanisms, including (i) crosslinking DNA purine bases, (ii) inducing oxidative stress, and (iii)  
363 interfering with DNA repair machinery, that can eventually lead to cancer cell death.[62] It is  
364 also the only agent used in group 3 MB that possesses ferroptotic potential.[45, 63] Given the  
365 induction of apoptotic and ferroptotic cell death by miR-1253, we next investigated if miR-1253  
366 can potentiate cisplatin response in group 3 MB. We first determined the IC<sub>50</sub> of cisplatin in  
367 scramble vs. miR-1253-transfected D425 (**Figure 6A**) and HDMB03 (**Figure 6B**) cells. In both  
368 cell lines, miR-1253 restoration lowered the IC<sub>50</sub> by ~2-fold (**Figure 6C**). We then performed  
369 colony formation assays with the IC<sub>25</sub> of cisplatin in HDMB03 cells (24 h: 2 μM) and noted a  
370 complete abrogation of colonies in miR-1253-expressing cells (**Figure 6D**).

371 Eliciting high levels of cellular superoxide is one of the mechanisms by which cisplatin can  
372 induce tumor cell death.[64] So, we next investigated whether cisplatin treatment enhances  
373 mitochondrial (mtROS) and cytosolic ROS in group 3 MB cells. Using prior fluorescent probes

374 for mtROS (MitoSOX™ Red) and cytosolic ROS (DCFDA), we studied miR-1253 transfected  
375 cells subjected to 10  $\mu$ M cisplatin in D425 and 2  $\mu$ M cisplatin in HDMB03 cells at 24 h; we  
376 concurrently examined cisplatin treatment (2  $\mu$ M) of ABCB7<sup>KO</sup> HDMB03 cells. As prior, miR-  
377 1253 expression or ABCB7<sup>KO</sup> induced significantly higher levels of mtROS and cytosolic ROS  
378 compared to control. Moreover, in all cases, miR-1253 potentiated cisplatin-mediated ROS  
379 (**Figures 6E-G**). Taken together, these findings not only highlighted the strong ability of miR-  
380 1253 to elicit ROS, but also revealed the cisplatin-potentiating action of miR-1253.

### 381 **Inhibiting ferroptosis rescues cisplatin potentiation by miR-1253 in group 3 MB cells.**

382 We next wanted to confirm that ferroptosis was elicited by miR-1253 alone and potentiated  
383 by combination with cisplatin. We systematically looked at mtROS and cytosolic ROS, lipid  
384 peroxidation, GSH levels, and levels of apoptotic and ferroptotic cell death in miR-1253-  
385 transfected or ABCB7<sup>KO</sup> cancer cells treated with 1) cisplatin and 2) in combination with  
386 ferrostatin-1 (a potent inhibitor of ferroptosis).

387 First, cisplatin alone induced oxidative stress; addition of ferrostatin-1 to cisplatin treatment  
388 led to a dramatic reduction in H<sub>2</sub>O<sub>2</sub> but not O<sub>2</sub><sup>•-</sup>. Second, miR-1253 expression or ABCB7<sup>KO</sup> led  
389 to a significant rise in oxidative stress, which was potentiated by the addition of cisplatin;  
390 treatment with ferrostatin-1 substantially reduced the generation of both H<sub>2</sub>O<sub>2</sub> and O<sub>2</sub><sup>•-</sup> (**Figures**  
391 **7A and 7B; Supplementary Figure 3A and 3B**). Similarly, while cisplatin alone had modest  
392 effects on lipid peroxidation, combining it with miR-1253 expression or ABCB7 knockdown  
393 resulted in the highest levels of lipid peroxidation; in turn, ferrostatin-1 significantly reduced  
394 lipid peroxidation in miR-1253 transfected and ABCB7<sup>KO</sup> HDMB03 cells (**Figure 7C and**  
395 **Supplementary Figure 3C**). Given the central importance of glutathione as an antioxidant, we  
396 observed that cisplatin depleted GSH in miR-1253 transfected and ABCB7<sup>KO</sup> HDMB03 cells

397 with the addition of ferrostatin having some recovery effects. As prior, cisplatin added to cells  
398 with ABCB7 inhibition had the strongest effect in depleting GSH; ferrostatin-1 catalyzed the  
399 recovery of reduced glutathione levels in these cells (**Figure 7D** and **Supplementary Figure**  
400 **3D**).

401 Finally, examining O<sub>2</sub>-mediated cell death (as a proxy for ferroptosis) at 24 h, cisplatin  
402 showed a small rise in ROS-mediated cell death and apoptosis, while miR-1253 led to a larger  
403 rise in both. Treating miR-1253-transfected HDMB03 cells with cisplatin accomplished a  
404 dramatic increase in both ROS-mediated and apoptotic cell death; ferrostatin-1 treatment rescued  
405 the former, strongly implicating the important contribution of ferroptosis to the mechanism of  
406 miR-1253-induced cell death . (**Figure 7E**). Together these data substantiate the cardinal role of  
407 miR-1253 in inducing ferroptosis and its potentiating effects on cisplatin cytotoxicity.

408

## 409 **Discussion**

410 Amongst the most devastating diagnoses in a pediatric patient is a tumor of the central  
411 nervous system, with medulloblastoma being the most common malignant tumor.[3, 4, 65, 66]  
412 Punctuated for group 3 MB, poor survival (5-year OS <50%) in these patients is attributable to a  
413 combination of young age at diagnosis (peak age 3-5), metastases at diagnosis (up to 50%), and  
414 c-Myc amplification.[9, 28, 67-70] Current treatment regimens have yet to impact the dismal  
415 prognosis with stagnant survival rates seen over the last decade.[71] An inability to tolerate  
416 mainstay of therapy especially for young patients fuels high relapse rates (~30%) which are  
417 universally fatal. For example, in children under the age of 4 years relapse was noted in ~60% of  
418 patients who did not receive upfront craniospinal irradiation. Moreover, relapse rates were  
419 highest in group 3 MB tumors and those with i17q and c-Myc amplification.[72] In those that do  
420 manage to survive, irreversible damage to the hypothalamic-pituitary axis is sustained from  
421 cytotoxic treatment regimens resulting in short stature, cognitive impairments, and emotional  
422 lability.[73, 74] Thus, the need for novel therapeutic strategies that mitigate drug-related  
423 cytotoxicity yet accomplish widespread tumor ablation for this subgroup is dire.

424 Elevated recurrence rates have often been conjectured to be linked to mechanisms for drug  
425 resistance in group 3 MB, which may include high expression of multi-drug resistance (MDR)  
426 genes belonging to the ABC transporter family.[36, 37, 39, 75, 76] Cytotoxic drugs, in  
427 combination with tumor suppressive miRNAs, have the potential for a more complex and  
428 profound effect on tumorigenesis and may possess the ability to address drug resistance patterns,  
429 especially if they can target MDR genes.[77] Here, we demonstrated a strong negative  
430 enrichment of the ABC transporter family with miR-1253 expression restoration in group 3 MB  
431 cells. Of the multiple transporters identified via our bioinformatics approach, we isolated



432 ABCB7, whose deregulated expression profile in group 3 tumors was strongly associated with  
433 poor prognosis, as a target of miR-1253.

434 ABCB7 is an iron transporter residing on the inner mitochondrial membrane and involved in  
435 Fe-S cluster biogenesis.[53, 78] ABCB7 deficiency can lead to decreased expression of electron  
436 transport chain (ETC) complex proteins I, II, IV and V, which can trigger impaired oxidative  
437 phosphorylation and mitochondrial membrane integrity resulting in oxidative stress.[40, 79-81]  
438 In glioma cells, inhibition of ABCB7 resulted in disruption of iron transport and ROS generation  
439 triggering apoptotic and non-apoptotic cell death.[41] Iron accumulation can trigger oxidative  
440 stress and vice versa[82, 83], resulting in lethal lipid peroxidation activating ferroptosis, which is  
441 distinct from apoptosis, necrosis, autophagy, and pyroptosis.[84]

442 With a strong premise for exploring iron imbalance through miR-1253, our subsequent  
443 results substantiated a ferroptotic role for miR-1253 in MB. First, miR-1253 induced intracellular  
444 iron accumulation in D425 and HDMB03 cells, effectively abrogated by pre-treatment with an  
445 iron chelator, DFO. ABCB7<sup>KO</sup> resulted in a similar phenotype. This resulted in elevated  
446 mitochondrial ROS ( $O_2^{\bullet -}$ ) and cytosolic ROS ( $H_2O_2$ ). We also recorded a high lipid oxidation  
447 profile in these cell lines concurrent with miR-1253 expression. Finally, using AnnexinV and  
448 MitoSOX<sup>TM</sup> Red staining, we revealed a significantly elevated dual staining population of cells  
449 in miR-1253-expressing cells. Taken together, these results are highly indicative of ferroptosis  
450 induction by miR-1253 in group 3 MB cells.

451 Ferroptosis can also be induced by disruption of glutathione synthesis or inhibition of  
452 glutathione peroxidase 4.[85] Cancer cells have the capacity to activate redox buffering systems  
453 to survive in a highly oxidative environment resulting from deregulated cellular functions.[86]  
454 Glutathione is a key player in this response and a critical cofactor for glutathione peroxidase 4

455 (GPX4). GPX4, a central regulator of ferroptosis upregulated in various cancers, uses glutathione  
456 to reduce ROS and lipid hydroperoxide levels thus facilitating tumor cell survival in an  
457 environment with high oxidative stress.[87] Additionally, GSH binds  $Fe^{2+}$  to prevent iron  
458 oxidation and is thus a critical component controlling the labile iron pool.[60] Of note, ABCB7  
459 harbors a GSH binding pocket, and GSH is a required substrate for cytosolic and nuclear Fe-S  
460 protein biogenesis and iron homeostasis.[52, 88] In group 3 tumors, we not only showed  
461 deregulated GPX4 expression but also a strong positive correlation with ABCB7. Resultantly,  
462 miR-1253 expression or ABCB7<sup>KO</sup> strongly inhibited GPX4 expression and reduced glutathione  
463 levels. These data demonstrate the contribution of disrupting GPX4 and glutathione metabolism  
464 in miR-1253-mediated oxidative stress mechanisms resulting in ferroptosis.

465 MiRNA mimics have been shown to possess the capability of restoring the sensitivity of  
466 cancer cells for chemotherapeutic agents and to thus subsequently enhance their effectiveness.  
467 For example, miR-429, miR-383, miR-101-3p, miR-195, miR-634, and miR-1294 elicited a 2-5  
468 fold reduction in the EC<sub>50</sub> and IC<sub>50</sub> values in combination with gemcitabine, temozolomide, and  
469 paclitaxel.[77, 89-94] Of the standard chemotherapies for medulloblastoma tumors, only  
470 cisplatin has been shown to trigger both apoptosis and ferroptosis, via oxidative stress, GSH  
471 depletion, and GPX4 inactivation.[45, 47, 63, 64] Moreover, a microarray-based study of the  
472 IC<sub>50</sub> of cisplatin in 60 NCI cell lines identified multiple ABC transporters, including 3 iron  
473 transporters, i.e. ABCB6, ABCB7 and ABCB10, in conferring cisplatin drug resistance.[95]

474 Given the ferroptotic mechanism we elucidated for miR-1253, we studied whether miR-1253  
475 expression can potentiate cisplatin cytotoxicity in group 3 MB cells. We report a 2-fold reduction  
476 in the IC<sub>50</sub> value of cisplatin with miR-1253 induction in D425 and HDMB03 cells. Combination  
477 treatment had dramatic effects on the clonal potential of HDMB03 cells. We then demonstrated

478 the highest induction of mitochondrial and cytosolic ROS, lipid peroxidation, and GSH depletion  
479 in miR-1253-expressing HDMB03 and ABCB7<sup>KO</sup> HDMB03 cells treated with cisplatin.  
480 Consequently, combination therapy resulted in the highest degree of ferroptosis in these cell  
481 lines. These effects were reversed by ferrostatin-1, a potent inhibitor of ferroptosis, lending  
482 further validity to the central role of ferroptosis in the mechanism of miR-1253-mediated effects  
483 and cisplatin potentiation.

484 Overall, our study has identified novel tumor suppressive properties for miR-1253. First,  
485 miR-1253 directly inhibits ABCB7 expression, thus inducing labile iron pool within MB cancer  
486 cells and stimulating ROS production. MiR-1253 can concurrently downregulate the expression  
487 of GPX4 and deplete GSH, further exacerbating ROS. Together, the generation of lipid  
488 hyperoxides progresses unabated, leading to cancer cell death via ferroptosis. We also leveraged  
489 these properties by showing potentiation of cisplatin cytotoxicity and thus enhanced therapeutic  
490 efficacy in group 3 MB cells. Together, our findings provide proof-of-concept for further  
491 exploration of tumor suppressive microRNAs as therapeutic adjuncts to standard chemotherapy.  
492 Such a strategy may mitigate the current limitations to treatment regimens in our youngest high  
493 risk patients.

494

495 **References**

- 496 [1] R.E. Taylor, P.H. Donachie, C.L. Weston, K.J. Robinson, H. Lucraft, F. Saran, D.W. Ellison, J.  
497 Ironside, D.A. Walker, B.L. Pizer, C. Children's, C.N.S.T.D. Leukaemia Group, Impact of radiotherapy  
498 parameters on outcome for patients with supratentorial primitive neuro-ectodermal tumours entered into  
499 the SIOP/UKCCSG PNET 3 study, *Radiother Oncol* 92(1) (2009) 83-8.
- 500 [2] Y.T. Udaka, R.J. Packer, *Pediatric Brain Tumors*, *Neurol Clin* 36(3) (2018) 533-556.
- 501 [3] Q.T. Ostrom, N. Patil, G. Cioffi, K. Waite, C. Kruchko, J.S. Barnholtz-Sloan, CBTRUS Statistical  
502 Report: Primary Brain and Other Central Nervous System Tumors Diagnosed in the United States in  
503 2013-2017, *Neuro Oncol* 22(12 Suppl 2) (2020) iv1-iv96.
- 504 [4] M.D. Taylor, P.A. Northcott, A. Korshunov, M. Remke, Y.J. Cho, S.C. Clifford, C.G. Eberhart, D.W.  
505 Parsons, S. Rutkowski, A. Gajjar, D.W. Ellison, P. Lichter, R.J. Gilbertson, S.L. Pomeroy, M. Kool, S.M.  
506 Pfister, Molecular subgroups of medulloblastoma: the current consensus, *Acta neuropathologica* 123(4)  
507 (2012) 465-72.
- 508 [5] M. Zapotocky, D. Mata-Mbemba, D. Sumerauer, P. Liby, A. Lassaletta, J. Zamecnik, L. Krskova, M.  
509 Kyncl, J. Stary, S. Laughlin, A. Arnoldo, C. Hawkins, U. Tabori, M.D. Taylor, E. Bouffet, C. Raybaud,  
510 V. Ramaswamy, Differential patterns of metastatic dissemination across medulloblastoma subgroups, *J*  
511 *Neurosurg Pediatr* 21(2) (2018) 145-152.
- 512 [6] P.A. Northcott, A. Korshunov, H. Witt, T. Hielscher, C.G. Eberhart, S. Mack, E. Bouffet, S.C.  
513 Clifford, C.E. Hawkins, P. French, J.T. Rutka, S. Pfister, M.D. Taylor, Medulloblastoma comprises four  
514 distinct molecular variants, *Journal of clinical oncology : official journal of the American Society of*  
515 *Clinical Oncology* 29(11) (2011) 1408-14.
- 516 [7] D.W. Ellison, M. Kocak, J. Dalton, H. Megahed, M.E. Lusher, S.L. Ryan, W. Zhao, S.L. Nicholson,  
517 R.E. Taylor, S. Bailey, S.C. Clifford, Definition of disease-risk stratification groups in childhood  
518 medulloblastoma using combined clinical, pathologic, and molecular variables, *Journal of clinical*  
519 *oncology : official journal of the American Society of Clinical Oncology* 29(11) (2011) 1400-7.

520 [8] M. Kool, J. Koster, J. Bunt, N.E. Hasselt, A. Lakeman, P. van Sluis, D. Troost, N.S. Meeteren, H.N.  
521 Caron, J. Cloos, A. Mrcic, B. Ylstra, W. Grajkowska, W. Hartmann, T. Pietsch, D. Ellison, S.C. Clifford,  
522 R. Versteeg, Integrated genomics identifies five medulloblastoma subtypes with distinct genetic profiles,  
523 pathway signatures and clinicopathological features, *PLoS One* 3(8) (2008) e3088.

524 [9] F.M.G. Cavalli, M. Remke, L. Rampasek, J. Peacock, D.J.H. Shih, B. Luu, L. Garzia, J. Torchia, C.  
525 Nor, A.S. Morrissy, S. Agnihotri, Y.Y. Thompson, C.M. Kuzan-Fischer, H. Farooq, K. Isaev, C. Daniels,  
526 B.K. Cho, S.K. Kim, K.C. Wang, J.Y. Lee, W.A. Grajkowska, M. Perek-Polnik, A. Vasiljevic, C. Faure-  
527 Conter, A. Jouvret, C. Giannini, A.A. Nageswara Rao, K.K.W. Li, H.K. Ng, C.G. Eberhart, I.F. Pollack,  
528 R.L. Hamilton, G.Y. Gillespie, J.M. Olson, S. Leary, W.A. Weiss, B. Lach, L.B. Chambless, R.C.  
529 Thompson, M.K. Cooper, R. Vibhakar, P. Hauser, M.C. van Veelen, J.M. Kros, P.J. French, Y.S. Ra, T.  
530 Kumabe, E. Lopez-Aguilar, K. Zitterbart, J. Sterba, G. Finocchiaro, M. Massimino, E.G. Van Meir, S.  
531 Osuka, T. Shofuda, A. Klekner, M. Zollo, J.R. Leonard, J.B. Rubin, N. Jabado, S. Albrecht, J. Mora, T.E.  
532 Van Meter, S. Jung, A.S. Moore, A.R. Hallahan, J.A. Chan, D.P.C. Tirapelli, C.G. Carlotti, M. Fouladi, J.  
533 Pimentel, C.C. Faria, A.G. Saad, L. Massimi, L.M. Liau, H. Wheeler, H. Nakamura, S.K. Elbabaa, M.  
534 Perezpena-Diazconti, F. Chico Ponce de Leon, S. Robinson, M. Zapotocky, A. Lassaletta, A. Huang, C.E.  
535 Hawkins, U. Tabori, E. Bouffet, U. Bartels, P.B. Dirks, J.T. Rutka, G.D. Bader, J. Reimand, A.  
536 Goldenberg, V. Ramaswamy, M.D. Taylor, Intertumoral Heterogeneity within Medulloblastoma  
537 Subgroups, *Cancer Cell* 31(6) (2017) 737-754 e6.

538 [10] V. Ramaswamy, M. Remke, E. Bouffet, C.C. Faria, S. Perreault, Y.J. Cho, D.J. Shih, B. Luu, A.M.  
539 Dubuc, P.A. Northcott, U. Schuller, S. Gururangan, R. McLendon, D. Bigner, M. Fouladi, K.L. Ligon,  
540 S.L. Pomeroy, S. Dunn, J. Triscott, N. Jabado, A. Fontebasso, D.T. Jones, M. Kool, M.A. Karajannis,  
541 S.L. Gardner, D. Zagzag, S. Nunes, J. Pimentel, J. Mora, E. Lipp, A.W. Walter, M. Ryzhova, O.  
542 Zheludkova, E. Kumirova, J. Alshami, S.E. Croul, J.T. Rutka, C. Hawkins, U. Tabori, K.E. Codisotti,  
543 R.J. Packer, S.M. Pfister, A. Korshunov, M.D. Taylor, Recurrence patterns across medulloblastoma  
544 subgroups: an integrated clinical and molecular analysis, *Lancet Oncol* 14(12) (2013) 1200-7.

- 545 [11] S. Rieken, A. Mohr, D. Habermehl, T. Welzel, K. Lindel, O. Witt, A.E. Kulozik, W. Wick, J. Debus,  
546 S.E. Combs, Outcome and prognostic factors of radiation therapy for medulloblastoma, *Int J Radiat*  
547 *Oncol Biol Phys* 81(3) (2011) e7-e13.
- 548 [12] R.J. Packer, J. Goldwein, H.S. Nicholson, L.G. Vezina, J.C. Allen, M.D. Ris, K. Muraszko, L.B.  
549 Rorke, W.M. Wara, B.H. Cohen, J.M. Boyett, Treatment of children with medulloblastomas with  
550 reduced-dose craniospinal radiation therapy and adjuvant chemotherapy: A Children's Cancer Group  
551 Study, *Journal of clinical oncology : official journal of the American Society of Clinical Oncology* 17(7)  
552 (1999) 2127-36.
- 553 [13] A. Gajjar, M. Chintagumpala, D. Ashley, S. Kellie, L.E. Kun, T.E. Merchant, S. Woo, G. Wheeler,  
554 V. Ahern, M.J. Krasin, M. Fouladi, A. Broniscer, R. Krance, G.A. Hale, C.F. Stewart, R. Dauser, R.A.  
555 Sanford, C. Fuller, C. Lau, J.M. Boyett, D. Wallace, R.J. Gilbertson, Risk-adapted craniospinal  
556 radiotherapy followed by high-dose chemotherapy and stem-cell rescue in children with newly diagnosed  
557 medulloblastoma (St Jude Medulloblastoma-96): long-term results from a prospective, multicentre trial,  
558 *The Lancet. Oncology* 7(10) (2006) 813-20.
- 559 [14] A.M. Martin, E. Raabe, C. Eberhart, K.J. Cohen, Management of pediatric and adult patients with  
560 medulloblastoma, *Curr Treat Options Oncol* 15(4) (2014) 581-94.
- 561 [15] J. Enriquez Perez, S. Fritzell, J. Kopecky, E. Visse, A. Darabi, P. Siesjo, The effect of locally  
562 delivered cisplatin is dependent on an intact immune function in an experimental glioma model, *Sci Rep*  
563 9(1) (2019) 5632.
- 564 [16] A.A. Nageswara Rao, D.J. Wallace, C. Billups, J.M. Boyett, A. Gajjar, R.J. Packer, Cumulative  
565 cisplatin dose is not associated with event-free or overall survival in children with newly diagnosed  
566 average-risk medulloblastoma treated with cisplatin based adjuvant chemotherapy: report from the  
567 Children's Oncology Group, *Pediatr Blood Cancer* 61(1) (2014) 102-6.
- 568 [17] M. Mognato, L. Celotti, MicroRNAs Used in Combination with Anti-Cancer Treatments Can  
569 Enhance Therapy Efficacy, *Mini Rev Med Chem* 15(13) (2015) 1052-62.

- 570 [18] X. He, X. Xiao, L. Dong, N. Wan, Z. Zhou, H. Deng, X. Zhang, MiR-218 regulates cisplatin  
571 chemosensitivity in breast cancer by targeting BRCA1, *Tumour Biol* 36(3) (2015) 2065-75.
- 572 [19] C. Sun, N. Li, Z. Yang, B. Zhou, Y. He, D. Weng, Y. Fang, P. Wu, P. Chen, X. Yang, D. Ma, J.  
573 Zhou, G. Chen, miR-9 regulation of BRCA1 and ovarian cancer sensitivity to cisplatin and PARP  
574 inhibition, *J Natl Cancer Inst* 105(22) (2013) 1750-8.
- 575 [20] L.M. Pouliot, Y.C. Chen, J. Bai, R. Guha, S.E. Martin, M.M. Gottesman, M.D. Hall, Cisplatin  
576 sensitivity mediated by WEE1 and CHK1 is mediated by miR-155 and the miR-15 family, *Cancer Res*  
577 72(22) (2012) 5945-55.
- 578 [21] W. Zhu, H. Xu, D. Zhu, H. Zhi, T. Wang, J. Wang, B. Jiang, Y. Shu, P. Liu, miR-200bc/429 cluster  
579 modulates multidrug resistance of human cancer cell lines by targeting BCL2 and XIAP, *Cancer*  
580 *Chemother Pharmacol* 69(3) (2012) 723-31.
- 581 [22] A. Mittal, D. Chitkara, S.W. Behrman, R.I. Mahato, Efficacy of gemcitabine conjugated and  
582 miRNA-205 complexed micelles for treatment of advanced pancreatic cancer, *Biomaterials* 35(25) (2014)  
583 7077-87.
- 584 [23] D.S. Hong, Y.K. Kang, M. Borad, J. Sachdev, S. Ejadi, H.Y. Lim, A.J. Brenner, K. Park, J.L. Lee,  
585 T.Y. Kim, S. Shin, C.R. Becerra, G. Falchook, J. Stoudemire, D. Martin, K. Kelnar, H. Peltier, V. Bonato,  
586 A.G. Bader, S. Smith, S. Kim, V. O'Neill, M.S. Beg, Phase 1 study of MRX34, a liposomal miR-34a  
587 mimic, in patients with advanced solid tumours, *British journal of cancer* 122(11) (2020) 1630-1637.
- 588 [24] C. Hoff, P. Seranski, J. Mollenhauer, B. Korn, T. Detzel, R. Reinhardt, J. Ramser, A. Poustka,  
589 Physical and transcriptional mapping of the 17p13.3 region that is frequently deleted in human cancer,  
590 *Genomics* 70(1) (2000) 26-33.
- 591 [25] J.D. McDonald, L. Daneshvar, J.R. Willert, K. Matsumura, F. Waldman, P.H. Cogen, Physical  
592 mapping of chromosome 17p13.3 in the region of a putative tumor suppressor gene important in  
593 medulloblastoma, *Genomics* 23(1) (1994) 229-32.
- 594 [26] E. Steichen-Gersdorf, M. Baumgartner, A. Kreczy, H. Maier, F.M. Fink, Deletion mapping on  
595 chromosome 17p in medulloblastoma, *British journal of cancer* 76(10) (1997) 1284-7.

- 596 [27] R.K. Kanchan, N. Perumal, P. Atri, R. Chirravuri Venkata, I. Thapa, D.L. Klinkebiel, A.M. Donson,  
597 D. Perry, M. Punsoni, G.A. Talmon, D.W. Coulter, D.R. Boue, M. Snuderl, M.W. Nasser, S.K. Batra, R.  
598 Vibhakar, S. Mahapatra, MiR-1253 exerts tumor-suppressive effects in medulloblastoma via inhibition of  
599 CDK6 and CD276 (B7-H3), *Brain Pathol* 30(4) (2020) 732-745.
- 600 [28] N. Perumal, R.K. Kanchan, D. Doss, N. Bastola, P. Atri, R. Chirravuri-Venkata, I. Thapa, R.  
601 Vengoji, S.K. Maurya, D. Klinkebiel, G.A. Talmon, M.W. Nasser, S.K. Batra, S. Mahapatra, MiR-212-3p  
602 functions as a tumor suppressor gene in group 3 medulloblastoma via targeting nuclear factor I/B (NFIB),  
603 *Acta neuropathologica communications* 9(1) (2021).
- 604 [29] Y. Mao, W. Li, K. Chen, Y. Xie, Q. Liu, M. Yao, W. Duan, X. Zhou, R. Liang, M. Tao, B7-H1 and  
605 B7-H3 are independent predictors of poor prognosis in patients with non-small cell lung cancer,  
606 *Oncotarget* 6(5) (2015) 3452-61.
- 607 [30] F.B. Kang, L. Wang, H.C. Jia, D. Li, H.J. Li, Y.G. Zhang, D.X. Sun, B7-H3 promotes aggression  
608 and invasion of hepatocellular carcinoma by targeting epithelial-to-mesenchymal transition via  
609 JAK2/STAT3/Slug signaling pathway, *Cancer Cell Int* 15 (2015) 45.
- 610 [31] M. Liu, Y. Zhang, J. Zhang, H. Cai, C. Zhang, Z. Yang, Y. Niu, H. Wang, X. Wei, W. Wang, P.  
611 Gao, H. Li, J. Zhang, G. Sun, MicroRNA-1253 suppresses cell proliferation and invasion of non-small-  
612 cell lung carcinoma by targeting WNT5A, *Cell death & disease* 9(2) (2018) 189.
- 613 [32] J. Mo, T. Zheng, L. Lei, P. Dai, J. Liu, H. He, J. Shi, X. Chen, T. Guo, B. Yuan, G. Ji, MicroRNA-  
614 1253 Suppresses Cell Proliferation Migration and Invasion of Osteosarcoma by Targeting MMP9,  
615 *Technol Cancer Res Treat* 20 (2021) 1533033821995278.
- 616 [33] Y. Xu, Y. Yao, P. Gao, Y. Cui, Upregulated circular RNA circ\_0030235 predicts unfavorable  
617 prognosis in pancreatic ductal adenocarcinoma and facilitates cell progression by sponging miR-1253 and  
618 miR-1294, *Biochem Biophys Res Commun* 509(1) (2019) 138-142.
- 619 [34] M.J. Merino, S. Gil, C.G. Macias, K. Lara, The Unknown microRNA Expression of Male Breast  
620 Cancer. Similarities and Differences with Female Ductal Carcinoma. Their Role as Tumor Biomarker,  
621 *Journal of Cancer* 9(3) (2018) 450-459.



- 622 [35] D. Yang, D. Zhang, miR-1253, a novel tumor suppressor gene in colon cancer, is associated with  
623 poor patients prognosis, *Clin Exp Med* (2021).
- 624 [36] G. Szakacs, J.K. Paterson, J.A. Ludwig, C. Booth-Genthe, M.M. Gottesman, Targeting multidrug  
625 resistance in cancer, *Nature reviews. Drug discovery* 5(3) (2006) 219-34.
- 626 [37] Y.H. Choi, A.M. Yu, ABC transporters in multidrug resistance and pharmacokinetics, and strategies  
627 for drug development, *Current pharmaceutical design* 20(5) (2014) 793-807.
- 628 [38] L. Bao, S. Hazari, S. Mehra, D. Kaushal, K. Moroz, S. Dash, Increased expression of P-glycoprotein  
629 and doxorubicin chemoresistance of metastatic breast cancer is regulated by miR-298, *The American*  
630 *journal of pathology* 180(6) (2012) 2490-503.
- 631 [39] M. Morfouace, S. Cheepala, S. Jackson, Y. Fukuda, Y.T. Patel, S. Fatima, D. Kawauchi, A.A.  
632 Shelat, C.F. Stewart, B.P. Sorrentino, J.D. Schuetz, M.F. Roussel, ABCG2 Transporter Expression  
633 Impacts Group 3 Medulloblastoma Response to Chemotherapy, *Cancer Res* 75(18) (2015) 3879-89.
- 634 [40] N. Maio, K.S. Kim, G. Holmes-Hampton, A. Singh, T.A. Rouault, Dimeric ferrochelatase bridges  
635 ABCB7 and ABCB10 homodimers in an architecturally defined molecular complex required for heme  
636 biosynthesis, *Haematologica* 104(9) (2019) 1756-1767.
- 637 [41] J.Y. Kim, J.K. Kim, H. Kim, ABCB7 simultaneously regulates apoptotic and non-apoptotic cell  
638 death by modulating mitochondrial ROS and HIF1alpha-driven NFkappaB signaling, *Oncogene* 39(9)  
639 (2020) 1969-1982.
- 640 [42] B.R. Stockwell, J.P. Friedmann Angeli, H. Bayir, A.I. Bush, M. Conrad, S.J. Dixon, S. Fulda, S.  
641 Gascon, S.K. Hatzios, V.E. Kagan, K. Noel, X. Jiang, A. Linkermann, M.E. Murphy, M. Overholtzer, A.  
642 Oyagi, G.C. Pagnussat, J. Park, Q. Ran, C.S. Rosenfeld, K. Salnikow, D. Tang, F.M. Torti, S.V. Torti, S.  
643 Toyokuni, K.A. Woerpel, D.D. Zhang, Ferroptosis: A Regulated Cell Death Nexus Linking Metabolism,  
644 *Redox Biology, and Disease*, *Cell* 171(2) (2017) 273-285.
- 645 [43] J.P. Friedmann Angeli, M. Schneider, B. Proneth, Y.Y. Tyurina, V.A. Tyurin, V.J. Hammond, N.  
646 Herbach, M. Aichler, A. Walch, E. Eggenhofer, D. Basavarajappa, O. Radmark, S. Kobayashi, T. Seibt,  
647 H. Beck, F. Neff, I. Esposito, R. Wanke, H. Forster, O. Yefremova, M. Heinrichmeyer, G.W. Bornkamm,

- 648 E.K. Geissler, S.B. Thomas, B.R. Stockwell, V.B. O'Donnell, V.E. Kagan, J.A. Schick, M. Conrad,  
649 Inactivation of the ferroptosis regulator Gpx4 triggers acute renal failure in mice, *Nat Cell Biol* 16(12)  
650 (2014) 1180-91.
- 651 [44] T. Hirschhorn, B.R. Stockwell, The development of the concept of ferroptosis, *Free Radic Biol Med*  
652 133 (2019) 130-143.
- 653 [45] J. Guo, B. Xu, Q. Han, H. Zhou, Y. Xia, C. Gong, X. Dai, Z. Li, G. Wu, Ferroptosis: A Novel Anti-  
654 tumor Action for Cisplatin, *Cancer Res Treat* 50(2) (2018) 445-460.
- 655 [46] L. Jiang, N. Kon, T. Li, S.J. Wang, T. Su, H. Hibshoosh, R. Baer, W. Gu, Ferroptosis as a p53-  
656 mediated activity during tumour suppression, *Nature* 520(7545) (2015) 57-62.
- 657 [47] X. Zhang, S. Sui, L. Wang, H. Li, L. Zhang, S. Xu, X. Zheng, Inhibition of tumor propellant  
658 glutathione peroxidase 4 induces ferroptosis in cancer cells and enhances anticancer effect of cisplatin, *J*  
659 *Cell Physiol* 235(4) (2020) 3425-3437.
- 660 [48] A. Drusco, A set of differentially expressed cerebro-spinal fluid (CSF) miRNAs can diagnose CNS  
661 malignancies, (2015).
- 662 [49] R.K. Kanchan, N. Perumal, P. Atri, R. Chirravuri Venkata, I. Thapa, D.L. Klinkebiel, A.M. Donson,  
663 D. Perry, M. Punsoni, G.A. Talmon, D.W. Coulter, D.R. Boue, M. Snuderl, M.W. Nasser, S.K. Batra, R.  
664 Vibhakar, S. Mahapatra, MiR-1253 exerts tumor-suppressive effects in medulloblastoma via inhibition of  
665 CDK6 and CD276 (B7-H3), *Brain pathology* (Zurich, Switzerland) (2020).
- 666 [50] H. Weishaupt, P. Johansson, A. Sundstrom, Z. Lubovac-Pilav, B. Olsson, S. Nelander, F.J.  
667 Swartling, Batch-normalization of cerebellar and medulloblastoma gene expression datasets utilizing  
668 empirically defined negative control genes, *Bioinformatics* 35(18) (2019) 3357-3364.
- 669 [51] J.B. Kaushal, R. Bhatia, R.K. Kanchan, P. Raut, S. Mallapragada, Q.P. Ly, S.K. Batra, S. Rachagani,  
670 Repurposing Niclosamide for Targeting Pancreatic Cancer by Inhibiting Hh/Gli Non-Canonical Axis of  
671 Gsk3beta, *Cancers (Basel)* 13(13) (2021).
- 672 [52] V. Srinivasan, A.J. Pierik, R. Lill, Crystal structures of nucleotide-free and glutathione-bound  
673 mitochondrial ABC transporter Atm1, *Science* 343(6175) (2014) 1137-40.

- 674 [53] C. Pondarre, B.B. Antiochos, D.R. Campagna, S.L. Clarke, E.L. Greer, K.M. Deck, A. McDonald,  
675 A.P. Han, A. Medlock, J.L. Kutok, S.A. Anderson, R.S. Eisenstein, M.D. Fleming, The mitochondrial  
676 ATP-binding cassette transporter *Abcb7* is essential in mice and participates in cytosolic iron-sulfur  
677 cluster biogenesis, *Hum Mol Genet* 15(6) (2006) 953-64.
- 678 [54] A. Seguin, D.M. Ward, Mitochondrial ABC Transporters and Iron Metabolism, *Journal of Clinical &*  
679 *Experimental Pathology* 08(01) (2018).
- 680 [55] Y. Zhao, J. Li, W. Guo, H. Li, L. Lei, Periodontitis-level butyrate-induced ferroptosis in periodontal  
681 ligament fibroblasts by activation of ferritinophagy, *Cell Death Discov* 6(1) (2020) 119.
- 682 [56] T. Tadokoro, M. Ikeda, T. Ide, H. Deguchi, S. Ikeda, K. Okabe, A. Ishikita, S. Matsushima, T.  
683 Koumura, K.I. Yamada, H. Imai, H. Tsutsui, Mitochondria-dependent ferroptosis plays a pivotal role in  
684 doxorubicin cardiotoxicity, *JCI Insight* 5(9) (2020).
- 685 [57] S. Dev, J.L. Babitt, Overview of iron metabolism in health and disease, *Hemodial Int* 21 Suppl 1  
686 (2017) S6-S20.
- 687 [58] H. Li, Y. Liu, L. Shang, J. Cai, J. Wu, W. Zhang, X. Pu, W. Dong, T. Qiao, K. Li, Iron regulatory  
688 protein 2 modulates the switch from aerobic glycolysis to oxidative phosphorylation in mouse embryonic  
689 fibroblasts, *Proc Natl Acad Sci U S A* 116(20) (2019) 9871-9876.
- 690 [59] R.J. Mailloux, Mitochondrial Antioxidants and the Maintenance of Cellular Hydrogen Peroxide  
691 Levels, *Oxid Med Cell Longev* 2018 (2018) 7857251.
- 692 [60] R.C. Hider, X.L. Kong, Glutathione: a key component of the cytoplasmic labile iron pool, *Biometals*  
693 24(6) (2011) 1179-87.
- 694 [61] B. Hassannia, B. Wiernicki, I. Ingold, F. Qu, S. Van Herck, Y.Y. Tyurina, H. Bayir, B.A. Abhari,  
695 J.P.F. Angeli, S.M. Choi, E. Meul, K. Heyninck, K. Declerck, C.S. Chirumamilla, M. Lahtela-Kakkonen,  
696 G. Van Camp, D.V. Krysko, P.G. Ekert, S. Fulda, B.G. De Geest, M. Conrad, V.E. Kagan, W. Vanden  
697 Berghe, P. Vandenabeele, T. Vanden Berghe, Nano-targeted induction of dual ferroptotic mechanisms  
698 eradicates high-risk neuroblastoma, *J Clin Invest* 128(8) (2018) 3341-3355.

- 699 [62] S. Dasari, P.B. Tchounwou, Cisplatin in cancer therapy: molecular mechanisms of action, *Eur J*  
700 *Pharmacol* 740 (2014) 364-78.
- 701 [63] Y. Zhou, Y. Shen, C. Chen, X. Sui, J. Yang, L. Wang, J. Zhou, The crosstalk between autophagy and  
702 ferroptosis: what can we learn to target drug resistance in cancer?, *Cancer Biol Med* 16(4) (2019) 630-  
703 646.
- 704 [64] M. Berndtsson, M. Hagg, T. Panaretakis, A.M. Havelka, M.C. Shoshan, S. Linder, Acute apoptosis  
705 by cisplatin requires induction of reactive oxygen species but is not associated with damage to nuclear  
706 DNA, *International journal of cancer. Journal international du cancer* 120(1) (2007) 175-80.
- 707 [65] R. Gilbertson, C. Wickramasinghe, R. Hernan, V. Balaji, D. Hunt, D. Jones-Wallace, J. Crolla, R.  
708 Perry, J. Lunec, A. Pearson, D. Ellison, Clinical and molecular stratification of disease risk in  
709 medulloblastoma, *British journal of cancer* 85(5) (2001) 705-12.
- 710 [66] N.G. Gottardo, J.R. Hansford, J.P. McGlade, F. Alvaro, D.M. Ashley, S. Bailey, D.L. Baker, F.  
711 Bourdeaut, Y.J. Cho, M. Clay, S.C. Clifford, R.J. Cohn, C.H. Cole, P.B. Dallas, P. Downie, F. Doz, D.W.  
712 Ellison, R. Endersby, P.G. Fisher, T. Hassall, J.A. Heath, H.L. Hii, D.T. Jones, R. Junckerstorff, S. Kellie,  
713 M. Kool, R.S. Kotecha, P. Lichter, S.J. Laughton, S. Lee, G. McCowage, P.A. Northcott, J.M. Olson, R.J.  
714 Packer, S.M. Pfister, T. Pietsch, B. Pizer, S.L. Pomeroy, M. Remke, G.W. Robinson, S. Rutkowski, T.  
715 Schoep, A.A. Shelat, C.F. Stewart, M. Sullivan, M.D. Taylor, B. Wainwright, T. Walwyn, W.A. Weiss,  
716 D. Williamson, A. Gajjar, Medulloblastoma Down Under 2013: a report from the third annual meeting of  
717 the International Medulloblastoma Working Group, *Acta neuropathologica* 127(2) (2014) 189-201.
- 718 [67] Y.J. Cho, A. Tsherniak, P. Tamayo, S. Santagata, A. Ligon, H. Greulich, R. Berhoukim, V. Amani,  
719 L. Goumnerova, C.G. Eberhart, C.C. Lau, J.M. Olson, R.J. Gilbertson, A. Gajjar, O. Delattre, M. Kool, K.  
720 Ligon, M. Meyerson, J.P. Mesirov, S.L. Pomeroy, Integrative genomic analysis of medulloblastoma  
721 identifies a molecular subgroup that drives poor clinical outcome, *Journal of clinical oncology : official*  
722 *journal of the American Society of Clinical Oncology* 29(11) (2011) 1424-30.
- 723 [68] P. Tamayo, Y.J. Cho, A. Tsherniak, H. Greulich, L. Ambrogio, N. Schouten-van Meeteren, T. Zhou,  
724 A. Buxton, M. Kool, M. Meyerson, S.L. Pomeroy, J.P. Mesirov, Predicting relapse in patients with

725 medulloblastoma by integrating evidence from clinical and genomic features, *Journal of clinical oncology*  
726 : official journal of the American Society of Clinical Oncology 29(11) (2011) 1415-23.

727 [69] E.M. Thompson, T. Hielscher, E. Bouffet, M. Remke, B. Luu, S. Gururangan, R.E. McLendon, D.D.  
728 Bigner, E.S. Lipp, S. Perreault, Y.-J. Cho, G. Grant, S.-K. Kim, J.Y. Lee, A.A.N. Rao, C. Giannini,  
729 K.K.W. Li, H.-K. Ng, Y. Yao, T. Kumabe, T. Tominaga, W.A. Grajkowska, M. Perek-Polnik, D.C.Y.  
730 Low, W.T. Seow, K.T.E. Chang, J. Mora, I.F. Pollack, R.L. Hamilton, S. Leary, A.S. Moore, W.J.  
731 Ingram, A.R. Hallahan, A. Jouvett, M. Fèvre-Montange, A. Vasiljevic, C. Faure-Contet, T. Shofuda, N.  
732 Kagawa, N. Hashimoto, N. Jabado, A.G. Weil, T. Gayden, T. Wataya, T. Shalaby, M. Grotzer, K.  
733 Zitterbart, J. Sterba, L. Kren, T. Hortobágyi, A. Klekner, B. László, T. Pócza, P. Hauser, U. Schüller, S.  
734 Jung, W.-Y. Jang, P.J. French, J.M. Kros, M.-L.C. van Veelen, L. Massimi, J.R. Leonard, J.B. Rubin, R.  
735 Vibhakar, L.B. Chambless, M.K. Cooper, R.C. Thompson, C.C. Faria, A. Carvalho, S. Nunes, J.  
736 Pimentel, X. Fan, K.M. Muraszko, E. López-Aguilar, D. Lyden, L. Garzia, D.J.H. Shih, N. Kijima, C.  
737 Schneider, J. Adamski, P.A. Northcott, M. Kool, D.T.W. Jones, J.A. Chan, A. Nikolic, M.L. Garre, E.G.  
738 Van Meir, S. Osuka, J.J. Olson, A. Jahangiri, B.A. Castro, N. Gupta, W.A. Weiss, I. Moxon-Emre, D.J.  
739 Mabbott, A. Lassaletta, C.E. Hawkins, U. Tabori, J. Drake, A. Kulkarni, P. Dirks, J.T. Rutka, A.  
740 Korshunov, S.M. Pfister, R.J. Packer, V. Ramaswamy, M.D. Taylor, Prognostic value of  
741 medulloblastoma extent of resection after accounting for molecular subgroup: a retrospective integrated  
742 clinical and molecular analysis, *The Lancet Oncology* 17(4) (2016) 484-495.

743 [70] O. Menyhart, F. Giangaspero, B. Györfy, Molecular markers and potential therapeutic targets in  
744 non-WNT/non-SHH (group 3 and group 4) medulloblastomas, *J Hematol Oncol* 12(1) (2019) 29.

745 [71] E. Ward, C. DeSantis, A. Robbins, B. Kohler, A. Jemal, Childhood and adolescent cancer statistics,  
746 2014, *CA Cancer J Clin* 64(2) (2014) 83-103.

747 [72] R.M. Hill, S. Richardson, E.C. Schwalbe, D. Hicks, J.C. Lindsey, S. Crosier, G. Rafiee, Y.  
748 Grabovska, S.B. Wharton, T.S. Jacques, A. Michalski, A. Joshi, B. Pizer, D. Williamson, S. Bailey, S.C.  
749 Clifford, Time, pattern, and outcome of medulloblastoma relapse and their association with tumour

750 biology at diagnosis and therapy: a multicentre cohort study, *The Lancet Child & Adolescent Health*  
751 4(12) (2020) 865-874.

752 [73] K.V. Hoff, B. Hinkes, N.U. Gerber, F. Deinlein, U. Mittler, C. Urban, M. Benesch, M. Warmuth-  
753 Metz, N. Soerensen, I. Zwiener, H. Goette, P.G. Schlegel, T. Pietsch, R.D. Kortmann, J. Kuehl, S.  
754 Rutkowski, Long-term outcome and clinical prognostic factors in children with medulloblastoma treated  
755 in the prospective randomised multicentre trial HIT'91, *Eur J Cancer* 45(7) (2009) 1209-1217.

756 [74] K. Ribi, C. Relly, M.A. Landolt, F.D. Alber, E. Boltshauser, M.A. Grotzer, Outcome of  
757 medulloblastoma in children: long-term complications and quality of life, *Neuropediatrics* 36(6) (2005)  
758 357-65.

759 [75] R.T. Othman, I. Kimishi, T.D. Bradshaw, L.C. Storer, A. Korshunov, S.M. Pfister, R.G. Grundy, I.D.  
760 Kerr, B. Coyle, Overcoming multiple drug resistance mechanisms in medulloblastoma, *Acta Neuropathol*  
761 *Commun* 2 (2014) 57.

762 [76] P.M. Chou, M. Reyes-Mugica, N. Barquin, T. Yasuda, X. Tan, T. Tomita, Multidrug resistance gene  
763 expression in childhood medulloblastoma: correlation with clinical outcome and DNA ploidy in 29  
764 patients, *Pediatric neurosurgery* 23(6) (1995) 283-91; discussion 291-2.

765 [77] S. Miroshnichenko, O. Patutina, Enhanced Inhibition of Tumorigenesis Using Combinations of  
766 miRNA-Targeted Therapeutics, *Front Pharmacol* 10 (2019) 488.

767 [78] P. Cavadini, G. Biasiotto, M. Poli, S. Levi, R. Verardi, I. Zanella, M. Derosas, R. Ingrassia, M.  
768 Corrado, P. Arosio, RNA silencing of the mitochondrial ABCB7 transporter in HeLa cells causes an iron-  
769 deficient phenotype with mitochondrial iron overload, *Blood* 109(8) (2007) 3552-9.

770 [79] A. Miyake, S. Higashijima, D. Kobayashi, T. Narita, T. Jindo, D.H. Setiamarga, S. Ohisa, N.  
771 Orihara, K. Hibiya, S. Konno, S. Sakaguchi, K. Horie, Y. Imai, K. Naruse, A. Kudo, H. Takeda, Mutation  
772 in the *abcb7* gene causes abnormal iron and fatty acid metabolism in developing medaka fish, *Dev*  
773 *Growth Differ* 50(9) (2008) 703-16.

- 774 [80] P. Gonzalez-Cabo, A. Bolinches-Amoros, J. Cabello, S. Ros, S. Moreno, H.A. Baylis, F. Palau, R.P.  
775 Vazquez-Manrique, Disruption of the ATP-binding cassette B7 (ABTM-1/ABCB7) induces oxidative  
776 stress and premature cell death in *Caenorhabditis elegans*, *J Biol Chem* 286(24) (2011) 21304-14.
- 777 [81] V. Kumar, A.K. A, R. Sanawar, A. Jaleel, T.R. Santhosh Kumar, C.C. Kartha, Chronic Pressure  
778 Overload Results in Deficiency of Mitochondrial Membrane Transporter ABCB7 Which Contributes to  
779 Iron Overload, Mitochondrial Dysfunction, Metabolic Shift and Worsens Cardiac Function, *Sci Rep* 9(1)  
780 (2019) 13170.
- 781 [82] M.T. Nunez, C. Nunez-Millacura, V. Tapia, P. Munoz, D. Mazariegos, M. Arredondo, P. Munoz, C.  
782 Mura, R.B. Maccioni, Iron-activated iron uptake: a positive feedback loop mediated by iron regulatory  
783 protein 1, *Biometals* 16(1) (2003) 83-90.
- 784 [83] S.J. Dixon, B.R. Stockwell, The role of iron and reactive oxygen species in cell death, *Nat Chem*  
785 *Biol* 10(1) (2014) 9-17.
- 786 [84] Y. Mou, J. Wang, J. Wu, D. He, C. Zhang, C. Duan, B. Li, Ferroptosis, a new form of cell death:  
787 opportunities and challenges in cancer, *J Hematol Oncol* 12(1) (2019) 34.
- 788 [85] M. Abdalkader, R. Lampinen, K.M. Kanninen, T.M. Malm, J.R. Liddell, Targeting Nrf2 to Suppress  
789 Ferroptosis and Mitochondrial Dysfunction in Neurodegeneration, *Front Neurosci* 12 (2018) 466.
- 790 [86] N.S. Aboeella, C. Brandle, T. Kim, Z.C. Ding, G. Zhou, Oxidative Stress in the Tumor  
791 Microenvironment and Its Relevance to Cancer Immunotherapy, *Cancers (Basel)* 13(5) (2021).
- 792 [87] W.S. Yang, R. SriRamaratnam, M.E. Welsch, K. Shimada, R. Skouta, V.S. Viswanathan, J.H.  
793 Cheah, P.A. Clemons, A.F. Shamji, C.B. Clish, L.M. Brown, A.W. Girotti, V.W. Cornish, S.L. Schreiber,  
794 B.R. Stockwell, Regulation of ferroptotic cancer cell death by GPX4, *Cell* 156(1-2) (2014) 317-331.
- 795 [88] M.M. Gaschler, A.A. Andia, H. Liu, J.M. Csuka, B. Hurlocker, C.A. Vaiana, D.W. Heindel, D.S.  
796 Zuckerman, P.H. Bos, E. Reznik, L.F. Ye, Y.Y. Tyurina, A.J. Lin, M.S. Shchepinov, A.Y. Chan, E.  
797 Peguero-Pereira, M.A. Fomich, J.D. Daniels, A.V. Bekish, V.V. Shmanai, V.E. Kagan, L.K. Mahal, K.A.  
798 Woerpel, B.R. Stockwell, FINO2 initiates ferroptosis through GPX4 inactivation and iron oxidation, *Nat*  
799 *Chem Biol* 14(5) (2018) 507-515.

- 800 [89] P. Fan, L. Liu, Y. Yin, Z. Zhao, Y. Zhang, P.S. Amponsah, X. Xiao, N. Bauer, A. Abukiwan, C.C.  
801 Nwaeburu, J. Gladkich, C. Gao, P. Schemmer, W. Gross, I. Herr, MicroRNA-101-3p reverses  
802 gemcitabine resistance by inhibition of ribonucleotide reductase M1 in pancreatic cancer, *Cancer Lett*  
803 373(1) (2016) 130-137.
- 804 [90] G. Yu, B. Jia, Y. Cheng, L. Zhou, B. Qian, Z. Liu, Y. Wang, MicroRNA-429 sensitizes pancreatic  
805 cancer cells to gemcitabine through regulation of PDCD4, *Am J Transl Res* 9(11) (2017) 5048-5055.
- 806 [91] H. Chen, L. Liu, X. Li, Y. Shi, N. Liu, MicroRNA-1294 inhibits the proliferation and enhances the  
807 chemosensitivity of glioma to temozolomide via the direct targeting of TPX2, *Am J Cancer Res* 8(2)  
808 (2018) 291-301.
- 809 [92] J. Jiang, C. Xie, Y. Liu, Q. Shi, Y. Chen, Up-regulation of miR-383-5p suppresses proliferation and  
810 enhances chemosensitivity in ovarian cancer cells by targeting TRIM27, *Biomed Pharmacother* 109  
811 (2019) 595-601.
- 812 [93] M.J. Tu, P.Y. Ho, Q.Y. Zhang, C. Jian, J.X. Qiu, E.J. Kim, R.J. Bold, F.J. Gonzalez, H. Bi, A.M. Yu,  
813 Bioengineered miRNA-1291 prodrug therapy in pancreatic cancer cells and patient-derived xenograft  
814 mouse models, *Cancer Lett* 442 (2019) 82-90.
- 815 [94] M. Wang, R. Qiu, S. Yu, X. Xu, G. Li, R. Gu, C. Tan, W. Zhu, B. Shen, Paclitaxelresistant gastric  
816 cancer MGC803 cells promote epithelialtomesenchymal transition and chemoresistance in  
817 paclitaxelsensitive cells via exosomal delivery of miR1555p, *Int J Oncol* 54(1) (2019) 326-338.
- 818 [95] V.B. Konkimalla, B. Kaina, T. Efferth, Role of transporter genes in cisplatin resistance, *In Vivo*  
819 22(3) (2008) 279-83.

820

821



## 822 **Figure Legends**

823 **Figure 1. ABCB7, a target of miR-1253, is deregulated in group 3 MB.** (A) Subgroup-  
824 specific ABCB7 expression assessment by RNA sequencing ( $\log_2$  transcripts per million) of a  
825 local medulloblastoma patient cohort (Kanchan *et al.*, GSE) showing specific deregulation in  
826 group 3 tumors. *CB*, pediatric cerebellum (n=10); *SHH*, sonic hedgehog (n=6); *G3*, group 3  
827 (n=7); *G4*, group 4 (n=12). (B) Poor prognostic profile demonstrable in high-expressing group 3  
828 MB patients (Cavali *et al.* GSE85217). (C) Confocal microscopic images confirming high  
829 ABCB7 expression in group 3 MB tumors (n=6) compared to pediatric cerebellum (n=6) and  
830 colocalization to the mitochondria based on COXIV fluorescence. Images captured at 10X  
831 magnification. (D) Western blotting analysis showing high ABCB7 expression in classic MB cell  
832 lines (group 3: D341, D425, HDMB03, D556; group 3/4: D283) compared to normal human  
833 astrocytes (NHA). Western blotting analysis showing downregulation of ABCB7 with miR-1253  
834 overexpression in (E) D425 and (F) HDMB03 cells. (G) Confocal microscopic images in D425  
835 and HDMB03 cells showing co-localization of ABCB7 to the mitochondria and downregulation  
836 with miR-1253 overexpression. Images captured at 63X magnification. (H) Dual-luciferase assay  
837 confirming direct binding of miR-1253 to ABCB7 in HDMB03 cells. Data presented as mean  $\pm$   
838 SD from experiments done in triplicates and analyzed using Mann-Whitney U test (A) or  
839 Student's t-test (H) (\* $p < 0.05$ , \*\* $p < 0.01$ , \*\*\* $p < 0.001$ , \*\*\*\* $p < 0.0001$ ).

840 **Figure 2. MiR-1253 triggers iron imbalance in group 3 MB cells.** Confocal images showing  
841 Calcein AM dye quenching in miR-1253-transfected (A) D425 and (B) HDMB03 cells  
842 indicating high cytosolic labile iron compared to scramble (NC) transfected cells.  $\text{Fe}^{2+}$  stained  
843 with Calcein AM (green), and nuclei stained with DAPI (blue). Similarly, escalation in both (C)  
844 cytosolic and (D) mitochondrial free  $\text{Fe}^{2+}$  demonstrable with miR-1253 expression, abrogated by

845 iron chelation with DFO. Mitochondria stained with MitoTracker™ Deep Red FM (**red**);  
846 cytosolic Fe<sup>2+</sup> stained with FerroOrange (**orange**); mitochondrial Fe<sup>2+</sup> stained with Mito-  
847 FerroGreen (**green**). Images captured at 63X.

848 **Figure 3. MiR-1253 triggers oxidative stress and lipid peroxidation leading to cell death in**  
849 **group 3 MB cells.** Confocal images showing elevated mitochondrial O<sub>2</sub><sup>•-</sup> (MitoSOX™ Red,  
850 **red**) and cytosolic H<sub>2</sub>O<sub>2</sub> (DCFDA, **green**) following miR-1253 expression in (A) D425 and (B)  
851 HDMB03 cells. Higher lipid peroxidation (measured by Image-iT® Lipid Peroxidation Kit) also  
852 noted in miR-1253 transfected (C) D425 and (D) HDMB03 cells. Flow cytometry analysis  
853 showing significantly higher O<sub>2</sub><sup>•-</sup> mediated cell death (representing ferroptosis) in miR-1253-  
854 expressing (E) D425 and (F) HDMB03 cells demonstrable by quantifying cells staining for both  
855 Annexin V-Cy5 (apoptosis) and for O<sub>2</sub><sup>•-</sup> (Mitosox) (Q2). Data presented as mean ± SD from  
856 experiments done in triplicates and analyzed using Student's t-test (\**p* <0.05, \*\**p* <0.01, \*\*\**p*  
857 <0.001, \*\*\*\**p* <0.0001). Images captured either at 20X (A and B) or 63X (C and D)  
858 magnification. Scale bar 200 μm.

859 **Figure 4. ABCB7<sup>KO</sup> can trigger iron imbalance and oxidative stress in group 3 MB cells.**  
860 CRISPR/Cas9-mediated ABCB7 gene knockout in HDMB03 cells confirmed by (A) RT-PCR  
861 and (B) Western blotting. (C) Confocal images showing Calcein AM dye quenching in  
862 ABCB7<sup>KO</sup> HDMB03 cells suggestive of high cytosolic labile iron compared to wild-type (WT)  
863 cells. Fe<sup>2+</sup> stained with Calcein AM (**green**) and nuclei stained with DAPI (**blue**). Confocal  
864 images demonstrating escalation in both (D) cytosolic and (E) mitochondrial free Fe<sup>2+</sup> with  
865 ABCB7 knockout, abrogated by iron chelation with DFO. Mitochondria stained with  
866 MitoTracker™ Deep Red FM (**red**); cytosolic Fe<sup>2+</sup> stained with FerroOrange (**orange**);  
867 mitochondrial Fe<sup>2+</sup> stained with Mito-FerroGreen (**green**). (F) Elevated oxidative stress

868 demonstrable in ABCB7<sup>KO</sup> HDMB03 cells as evidenced by higher mitochondrial O<sub>2</sub><sup>•-</sup>  
869 (MitoSOX<sup>TM</sup> Red, **red**) and cytosolic H<sub>2</sub>O<sub>2</sub> (DCFDA, **green**) compared to wild-type. Images  
870 captured at 63X (C-E) or 20X (F) magnification. Scale bar 400 μm. Data presented as mean ±  
871 SD from experiments done in triplicates and analyzed using Student's t-test (\**p* <0.05, \*\**p*  
872 <0.01, \*\*\**p* <0.001, \*\*\*\**p* <0.0001).

873 **Figure 5. MiR-1253 and ABCB7 regulate GPX4 expression, a key regulator of ferroptosis.**

874 (A) Schematic showing the important role of GPX4 in mitigating ferroptosis. Image created with  
875 [Biorender.com](https://www.biorender.com). (B) Subgroup-specific GPX4 expression assessment by RNA sequencing (log<sub>2</sub>  
876 transcripts per million) of a local medulloblastoma patient cohort (Kanchan *et al.*, GSE148390)  
877 showing deregulation in MB tumors, highest in group 3 MB. CB, pediatric cerebellum (n=10);  
878 SHH, sonic hedgehog (n=6); G3, group 3 (n=7); G4, group 4 (n=12). (C) Poor prognostic profile  
879 demonstrable in high-expressing MB patients (Cavali *et al.* GSE85217). (D) Confocal  
880 microscopic images confirming high GPX4 expression in group 3 MB tumors (n=6) compared to  
881 pediatric cerebellum (n=6) and colocalization to the mitochondria based on COXIV  
882 fluorescence. Images captured at 10X magnification. (E) Western blotting analysis showing high  
883 *in vitro* GPX4 expression in classic MB cell lines (group 3: D341, D425, HDMB03; group 3/4:  
884 D283) compared to normal human astrocytes (NHA). (F) Western blotting analysis showing a  
885 strong inhibitory effect of miR-1253 on GPX4 expression in D425 and HDMB03 cells. (G)  
886 Near-abrogation of GPX4 expression with ABCB7 knockout in HDMB03 cells. Spearman  
887 correlation showing positive correlation between ABCB7 and GPX4 expression. (Kanchan *et al.*,  
888 GSE148390). (H) Similar inhibitory effect noted on total glutathione (GSH) levels in miR-1253-  
889 transfected D425 and HDMB03 cells. Data presented as mean ± SD from experiments done in  
890 triplicates and analyzed using Student's t-test (\**p* <0.05, \*\**p* <0.01, \*\*\**p* <0.001).

891 **Figure 6. MiR-1253 potentiates cisplatin toxicity in group 3 MB cells.** IC<sub>50</sub> of cisplatin in (A)  
892 D425 and (B) HDMB03 cells transfected with scramble vs. miR-1253 for 24-72 h. (C) Tabulated  
893 results presented as fold-change in cisplatin IC<sub>50</sub> between scramble and miR-1253 in D425 and  
894 HDMB03 cells at different time points. (D) Colonogenic assay demonstrating inhibitory effect of  
895 cisplatin vs. miR-1253 vs. combination on colony formation in HDMB03 cells. MiR-1253-  
896 transfected (E) D425 and (F) HDMB03, and (G) ABCB7<sup>KO</sup> HDMB03 cells treated with cisplatin  
897 (D425 24-h IC<sub>25</sub> ~10 μM; HDMB03 24-h IC<sub>25</sub> ~2 μM) and stained with MitoSOX<sup>TM</sup> Red (**red**)  
898 for mitochondrial superoxide anions (O<sub>2</sub><sup>•-</sup>) and DCFDA (**green**) for cytosolic ROS (H<sub>2</sub>O<sub>2</sub>).  
899 Representative images and graphs showing the potentiating effect of combining miR-1253 with  
900 cisplatin. Images captured at 20X magnification. Scale bar 400 μm. Data presented as mean ±  
901 SD from experiments done in triplicates and analyzed using one-way analysis of variance (\**p*  
902 <0.05, \*\**p* <0.01, \*\*\**p* <0.001, \*\*\*\**p* <0.0001).

903 **Figure 7. MiR-1253 potentiates cisplatin cytotoxicity in group 3 MB cells by ferroptosis.**  
904 Oxidative stress measured by quantifying (A) mitochondrial O<sub>2</sub><sup>•-</sup> (MitoSOX<sup>TM</sup> Red, **red**) and  
905 (B) cytosolic H<sub>2</sub>O<sub>2</sub> (DCFDA, **green**) in miR-1253-transfected HDMB03 cells showing  
906 potentiating effect of miR-1253 on cisplatin, and inhibited by a ferroptosis inhibitor, ferrostatin-1  
907 (FER). Images captured at 20X magnification. Scale bar 200 μm. (C) As measured by Image-  
908 iT® Lipid Peroxidation Kit, confocal images showing the highest lipid peroxidation in  
909 combination treatment groups (miR + Cis), again rescued by ferrostatin-1, in miR-1253-  
910 transfected HDMB03 cells. Images captured at 63X magnification. (D) Evaluation of oxidized  
911 glutathione (GSH) showing punctuated effects in combination treatment groups (miR + Cis) with  
912 rescue in the presence of ferrostatin in miR-1253-transfected HDMB03 cells. (E) Analysis of cell  
913 death by flow cytometry showing significantly higher O<sub>2</sub><sup>•-</sup> mediated cell death (representing

914 ferroptosis) in miR-1253-expressing HDMB03 cells demonstrable by quantifying cells staining  
915 for both Annexin V-Cy5 (apoptosis) and for O<sub>2</sub><sup>•-</sup> (Mitoxox) (Q2). Data presented as mean ± SD  
916 from experiments done in triplicates and analyzed using one-way analysis of variance (\**p* <0.05,  
917 \*\**p* <0.01, \*\*\**p* <0.001, \*\*\*\**p* <0.0001).

918 **Supplementary Figure 1. Deregulated expression of ABCB7 in MB is associated with poor**  
919 **survival and is negatively regulated by miR-1253.** (A) Enrichment plot by KEGG pathways  
920 analysis demonstrating a strong negative enrichment score for the ABC transporter family with  
921 miR-1253 expression restoration in HDMB03 cells. (B) ABC transporter expression heatmap  
922 illustrating effect of miR-1253 overexpression in HDMB03 cells (by transient transfection). (C)  
923 Deregulated ABC transporters in group 3 MB (column 1), effect of deregulated expression on  
924 survival (column 2), and transporters significantly downregulated by miR-1253 expression  
925 (column 3). This analysis revealed ABCB7 as the best putative target for miR-1253. (D)  
926 Expression profile for ABCB7 in multiple MB cohorts. *CB*, normal cerebellum, Roth *et al.* 2008  
927 (n=9, GSE3526); *MB 1*, Gilbertson *et al.* 2012 (n=76, GSE37418); *MB 2*, Pfister *et al.* 2017  
928 (n=223); *MB 3*, Delattre *et al.* 2012 (n=57); *MB 4*, Kool *et al.* 2009 (n=62, GSE10327). (E) Poor  
929 prognostic profile demonstrable in high ABCB7-expressing medulloblastoma patients (Cavali *et*  
930 *al.* GSE85217). Subgroup-specific ABCB7 expression in two separate medulloblastoma patient  
931 cohorts, i.e. (F) Weishaupt *et al.*, GSE124814; *CB*, normal cerebellum (n=291); *WNT*, wingless  
932 (n=118); *SHH*, sonic hedgehog (n=405); *G3*, group 3 (n=233); *G4*, group 4 (n=530); and (G)  
933 Luo *et al.*, GSE164677; *CB*, normal cerebellum (n=4); *WNT*, wingless (n=6); *SHH*, sonic  
934 hedgehog (n=20); *G3*, group 3 (n=14); *G4*, group 4 (n=19); Data normalized via RUV method  
935 (F) or DeSeq2 median of ratios (MoR) method (G) and both analyzed using Mann-Whitney U  
936 (\**p* <0.05, \*\**p* <0.01, \*\*\**p* <0.001, \*\*\*\**p* <0.0001).

937 **Supplementary Figure 2. GPX4 expression is elevated in medulloblastoma.** Subgroup-  
938 specific GPX4 expression data from Weishaupt *et al.*, GSE124814; *CB*, normal cerebellum  
939 (n=291); *WNT*, wingless (n=118); *SHH*, sonic hedgehog (n=405); *G3*, group 3 (n=233); *G4*,  
940 group 4 (n=530); Data normalized via RUV method and analyzed using Mann-Whitney U (\**p*  
941 <0.05, \*\**p* <0.01, \*\*\**p* <0.001, \*\*\*\**p* <0.0001).

942 **Supplementary Figure 3. ABCB7 knockout potentiates cisplatin cytotoxicity in group 3 MB**  
943 **cells by ferroptosis.** Oxidative stress measured by quantifying (A) mitochondrial O<sub>2</sub><sup>•-</sup>  
944 (MitoSOX™ Red, **red**) and (B) cytosolic H<sub>2</sub>O<sub>2</sub> (DCFDA, **green**) in miR-1253-transfected  
945 HDMB03 cells showing potentiating effect of miR-1253 on cisplatin, and inhibited by a  
946 ferroptosis inhibitor, ferrostatin-1 (FER). Images captured at 20X magnification. Scale bar 200  
947 μm. (C) As measured by Image-iT® Lipid Peroxidation Kit, confocal images showing the  
948 highest lipid peroxidation in combination treatment groups (ABCB7<sup>KO</sup> + Cis), again rescued by  
949 ferrostatin-1, in ABCB7<sup>KO</sup> HDMB03 cells. Images captured at 63X magnification. (D)  
950 Evaluation of oxidized glutathione (GSH) showing punctuated effects in combination treatment  
951 groups (ABCB7<sup>KO</sup> + Cis) with rescue in the presence of ferrostatin in ABCB7<sup>KO</sup> HDMB03 cells.  
952 Data presented as mean ± SD from experiments done in triplicates and analyzed using one-way  
953 analysis of variance (\**p* <0.05, \*\**p* <0.01, \*\*\**p* <0.001, \*\*\*\**p* <0.0001).



A

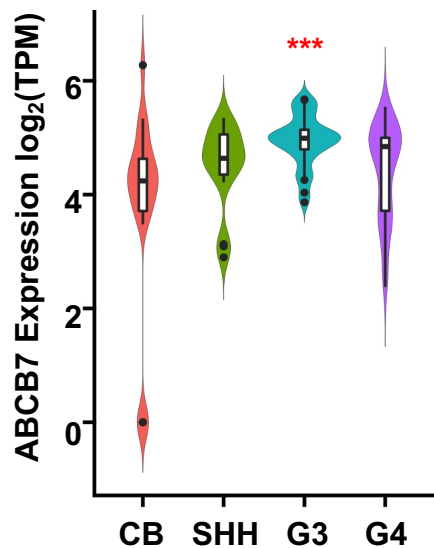

B

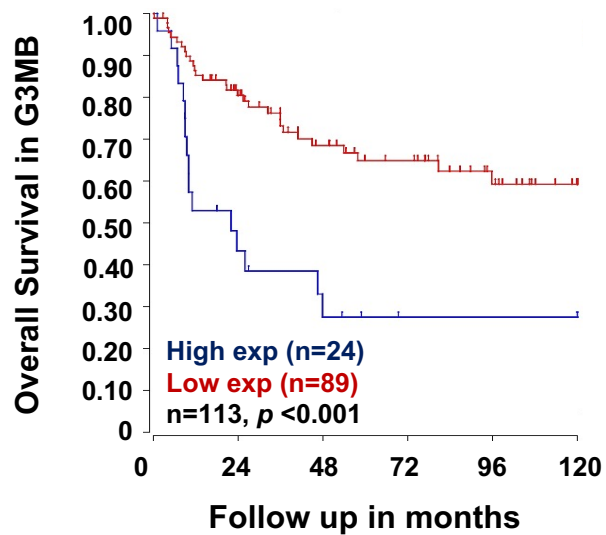

C

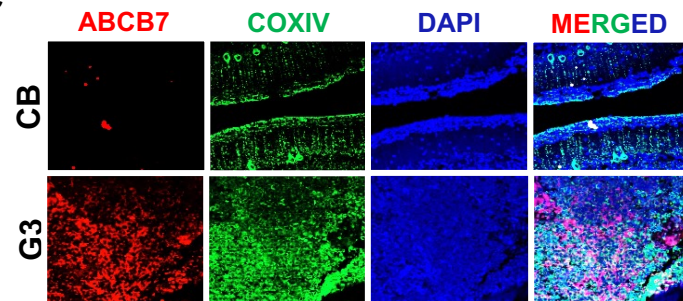

E

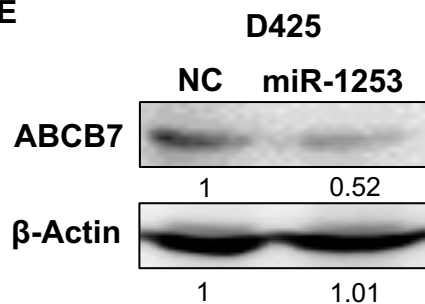

F

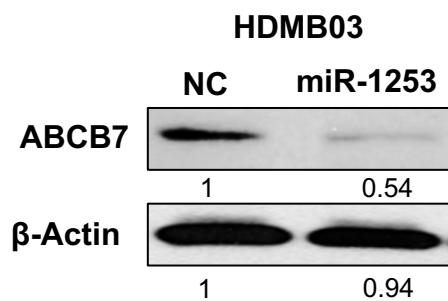

D

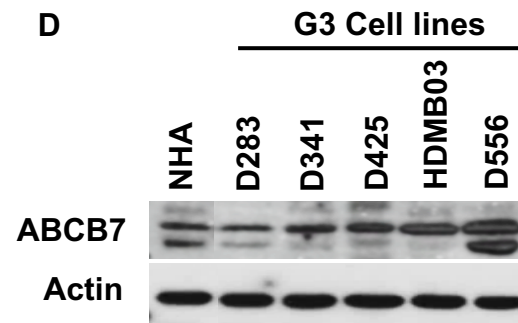

H

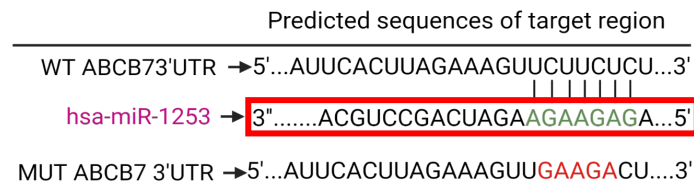

G

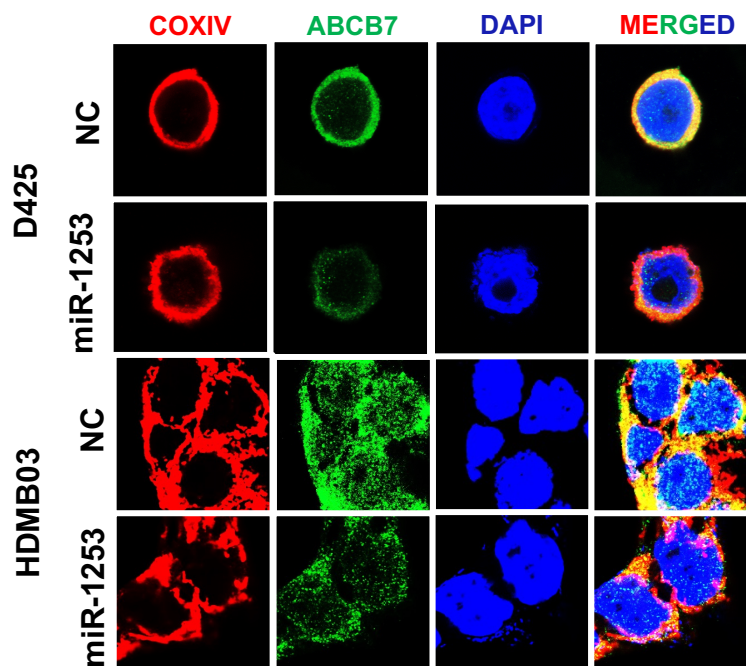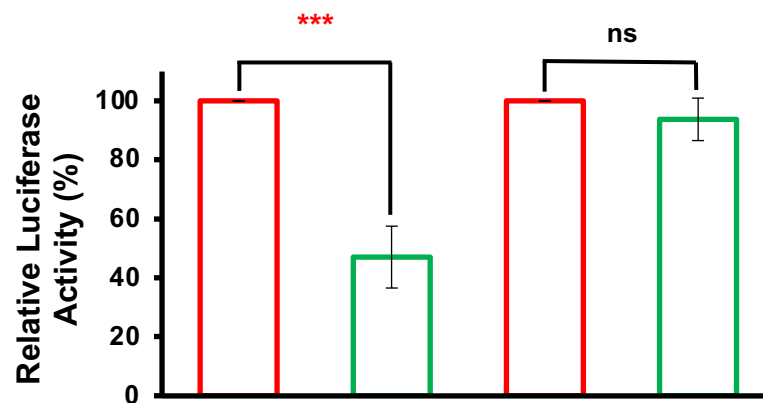

|          |   |   |   |   |
|----------|---|---|---|---|
| scr miR  | + | - | + | - |
| miR-1253 | - | + | - | + |
| wtABCB7  | + | + | - | - |
| mtABCB7  | - | - | + | + |

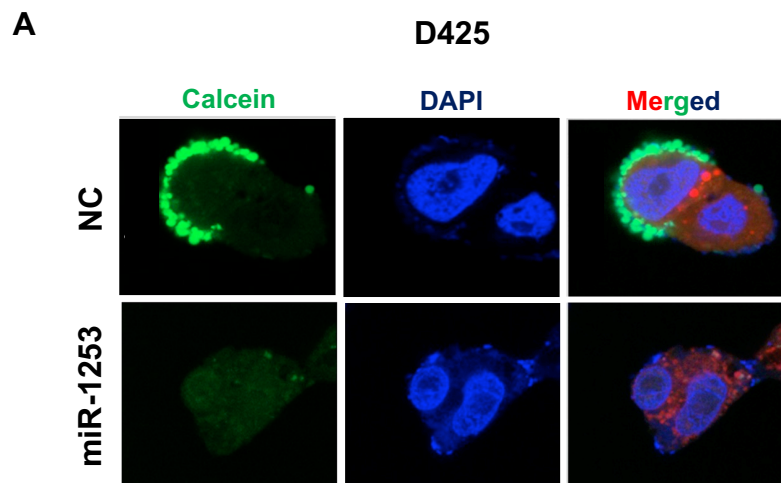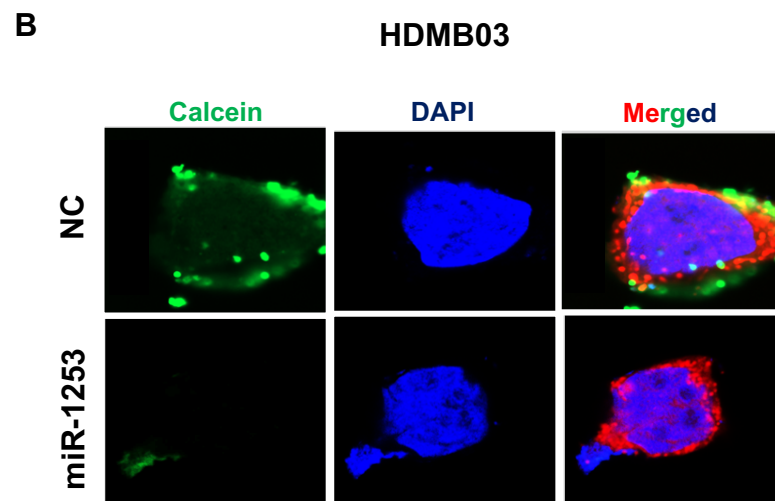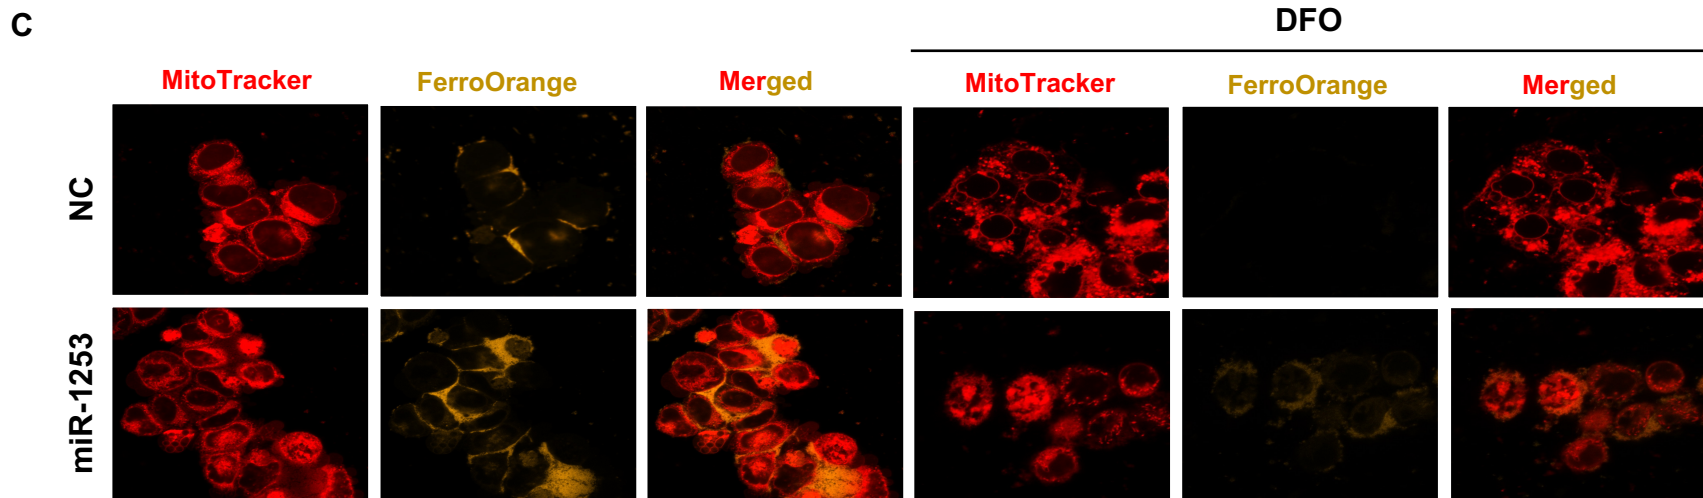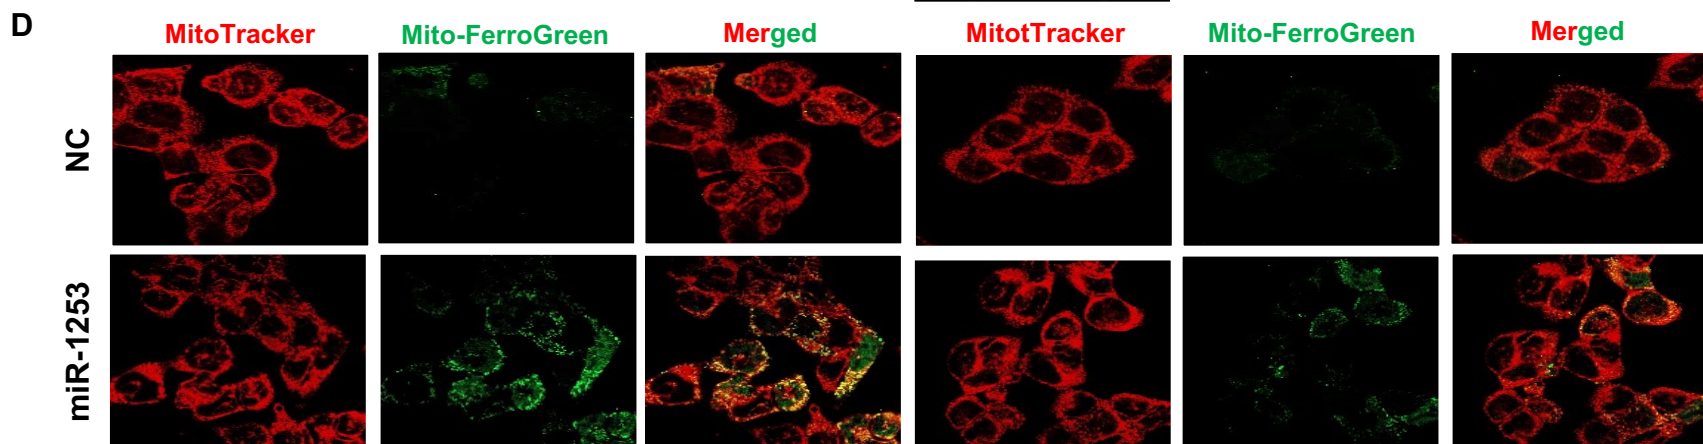



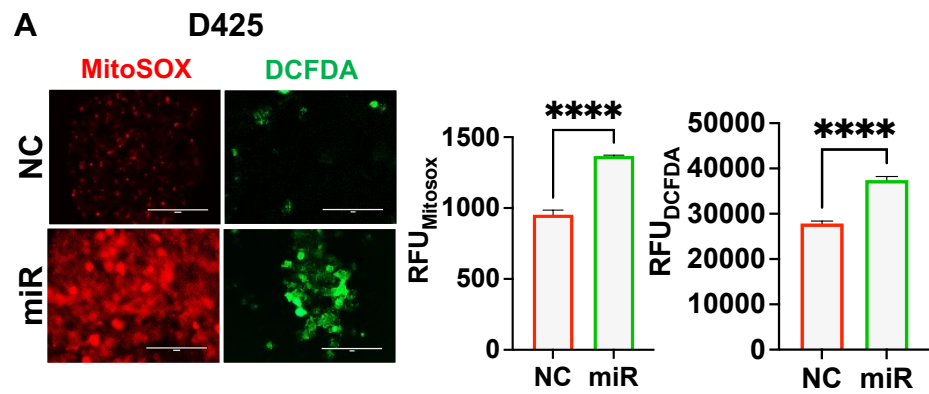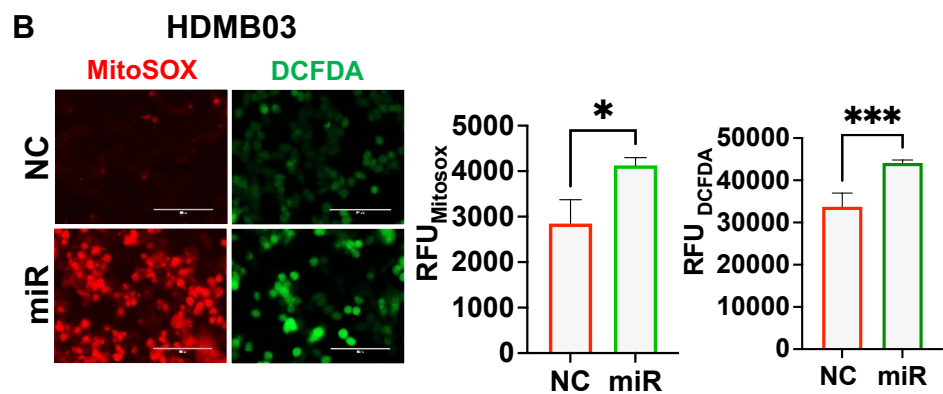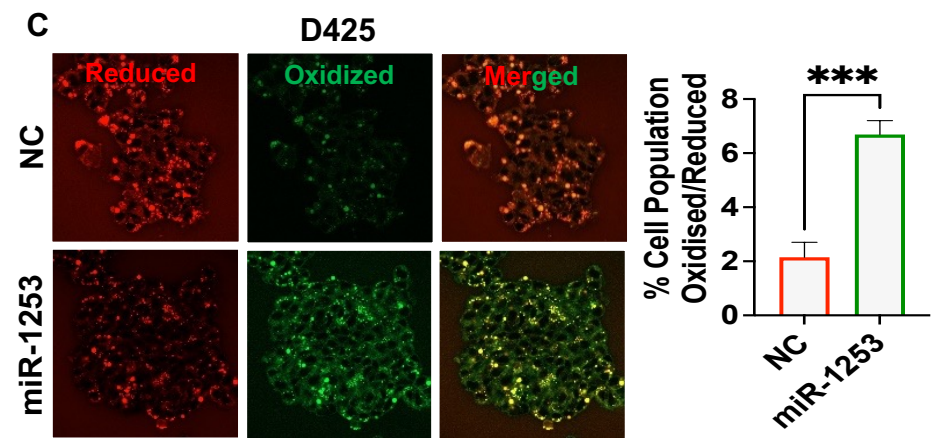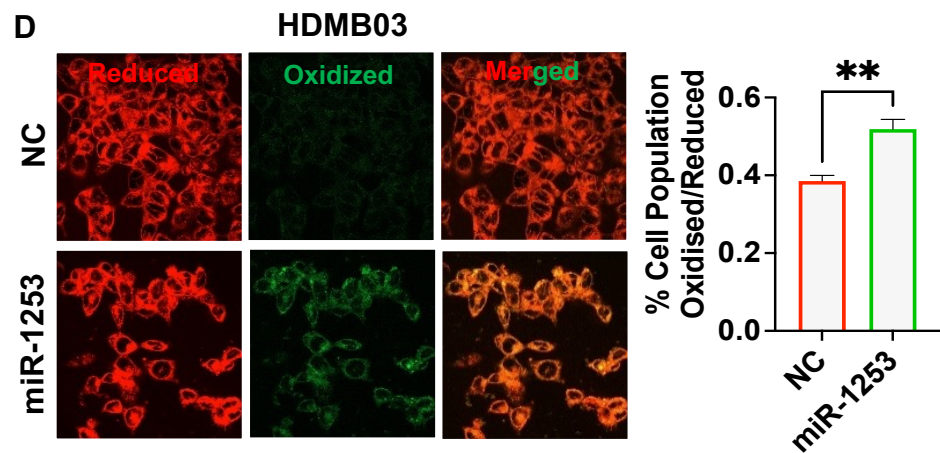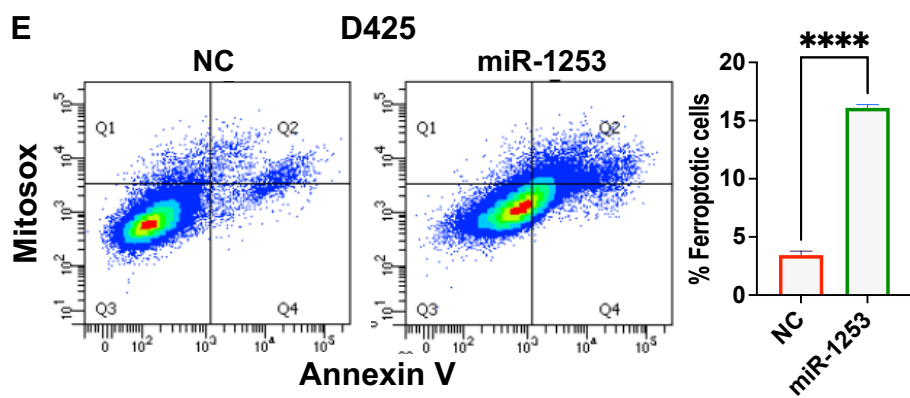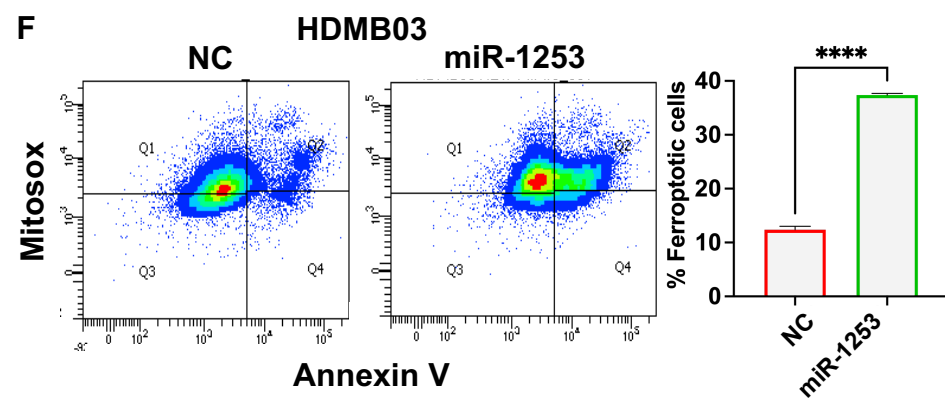

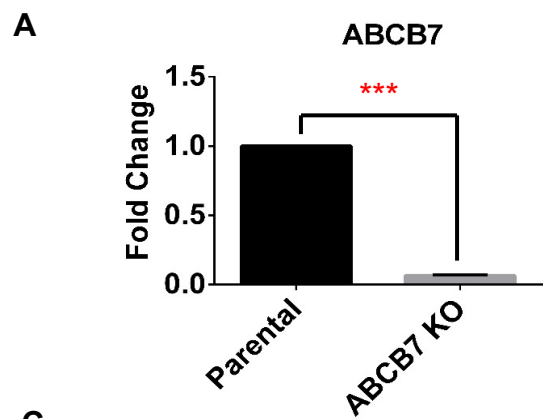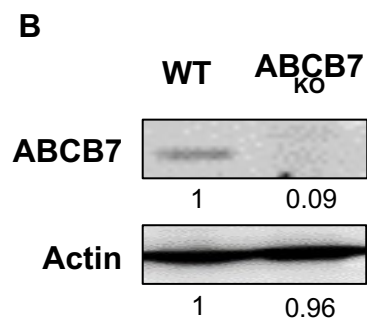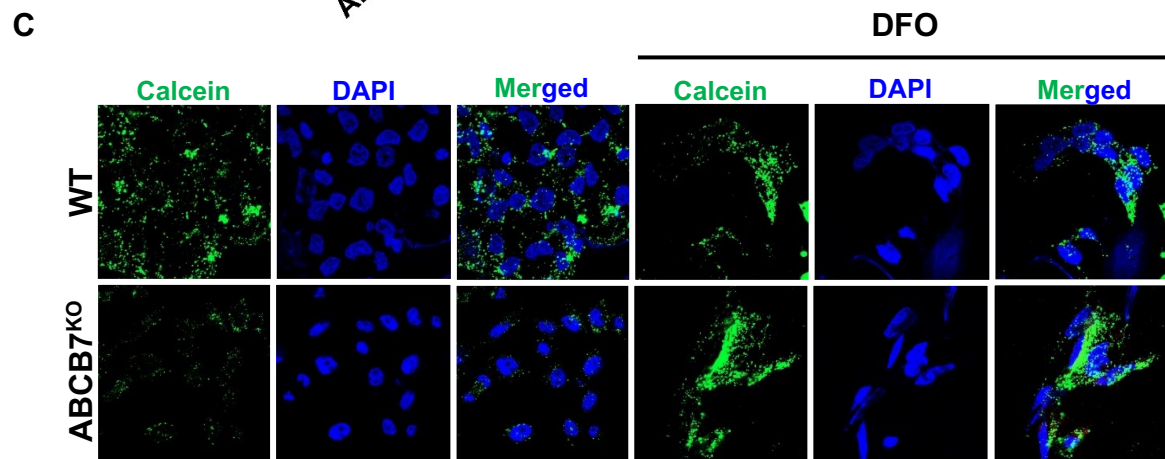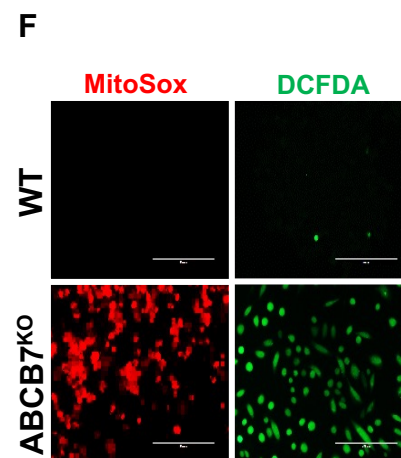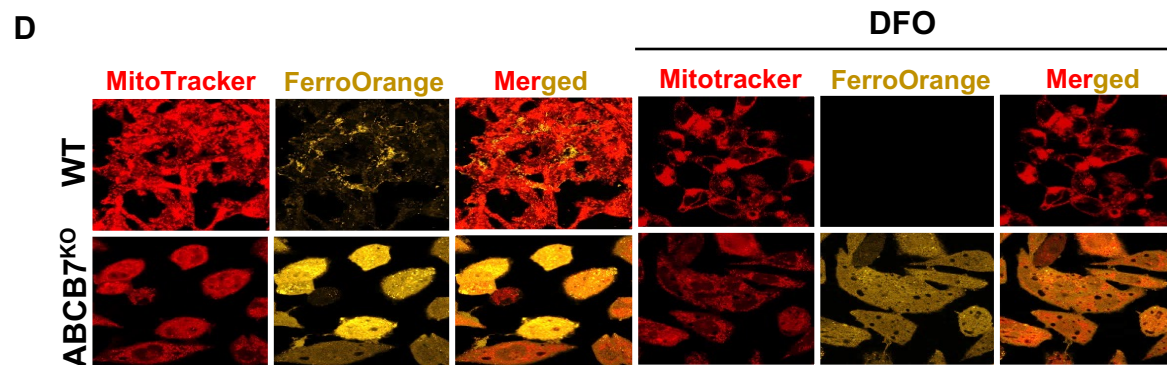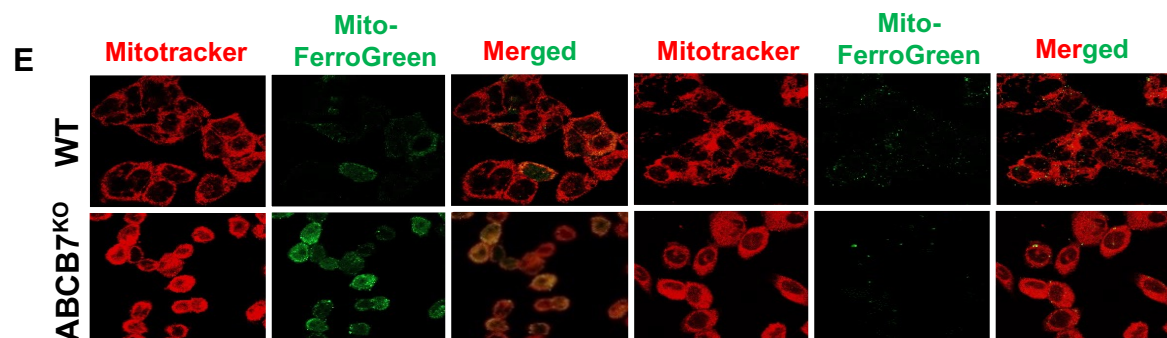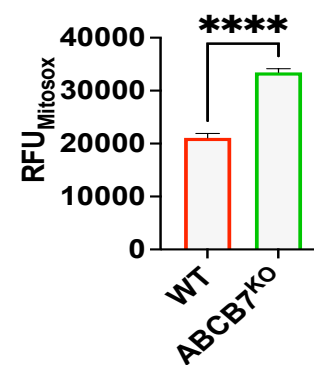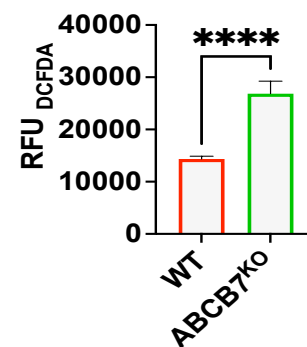

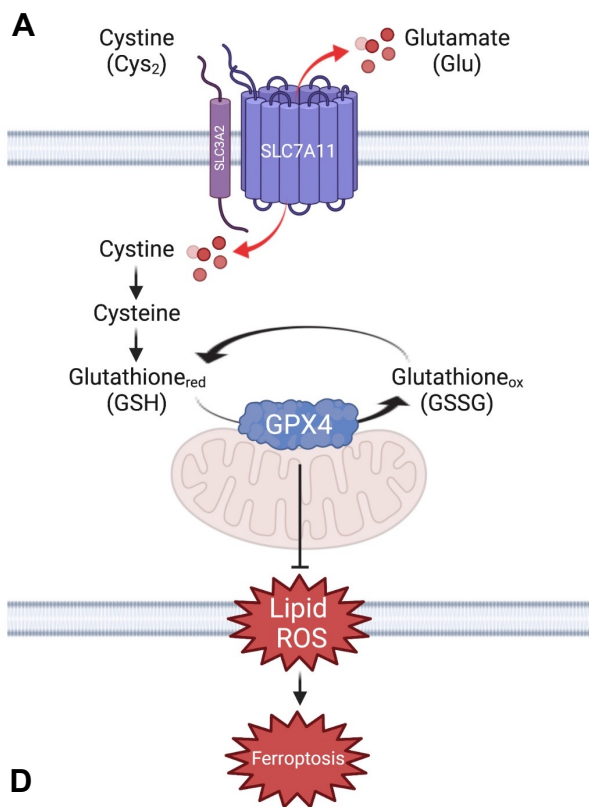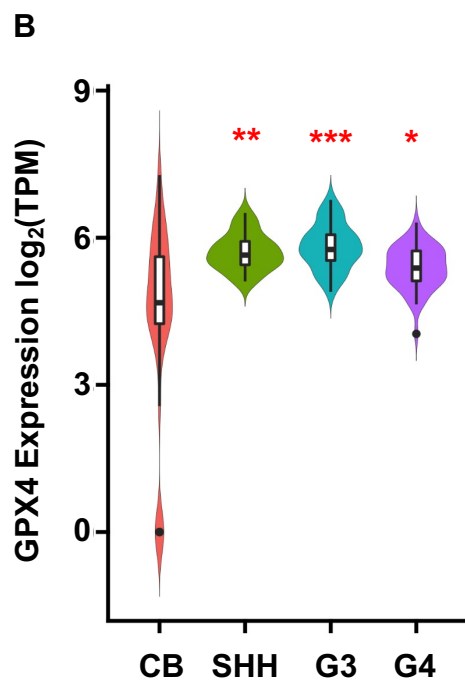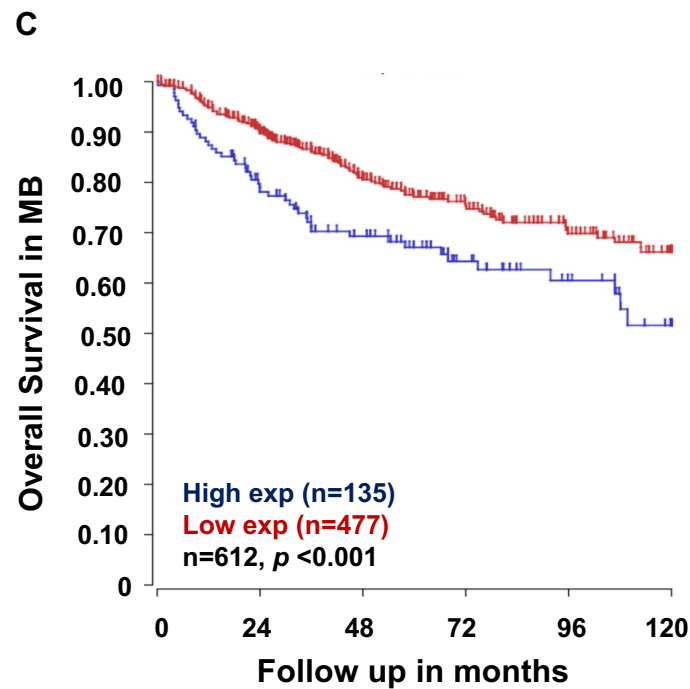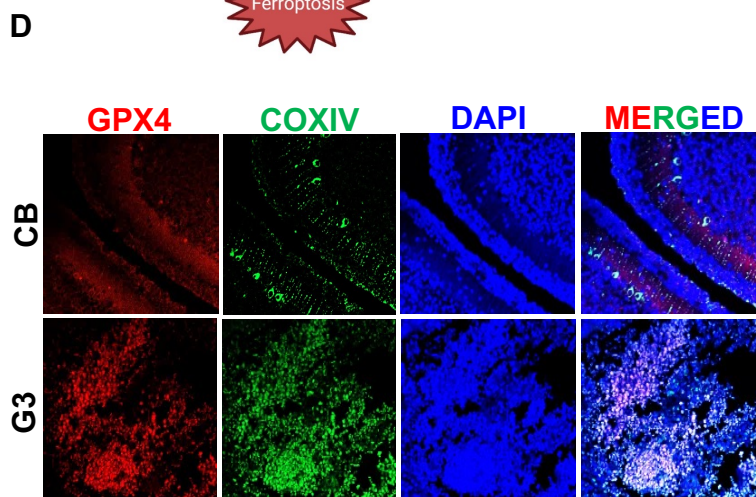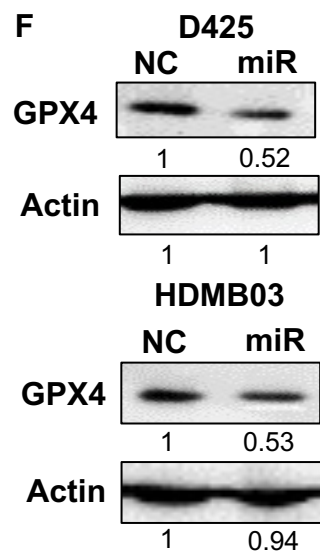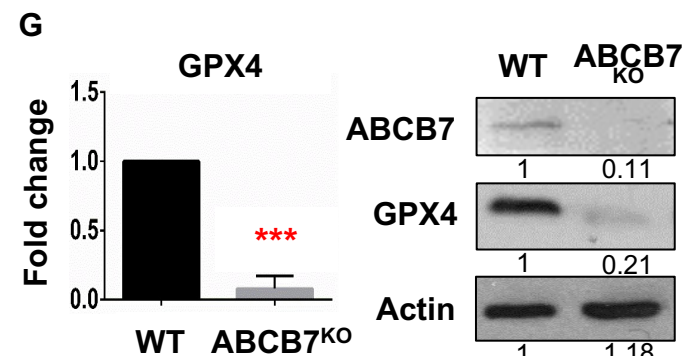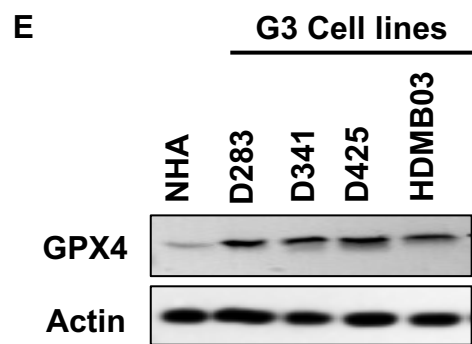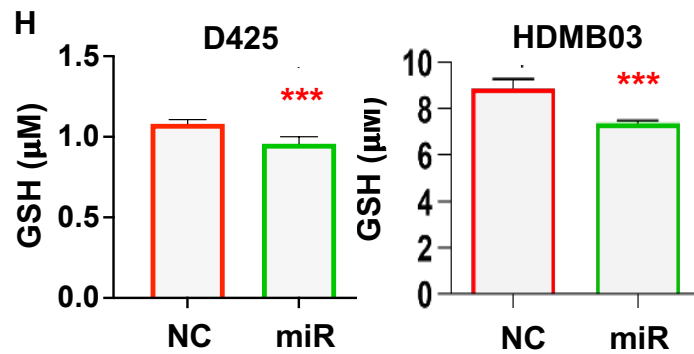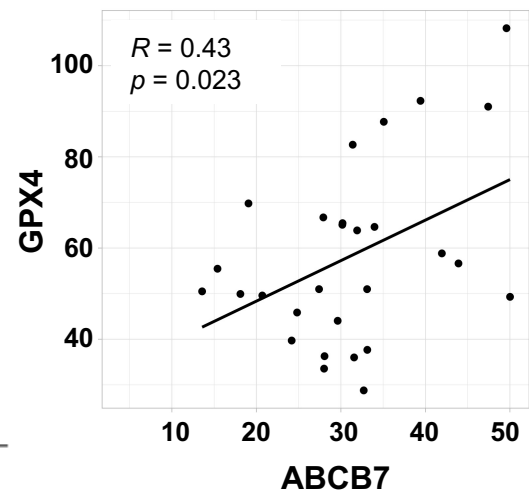



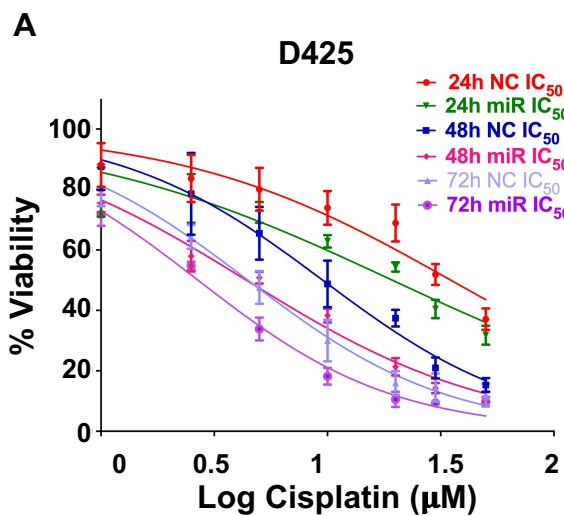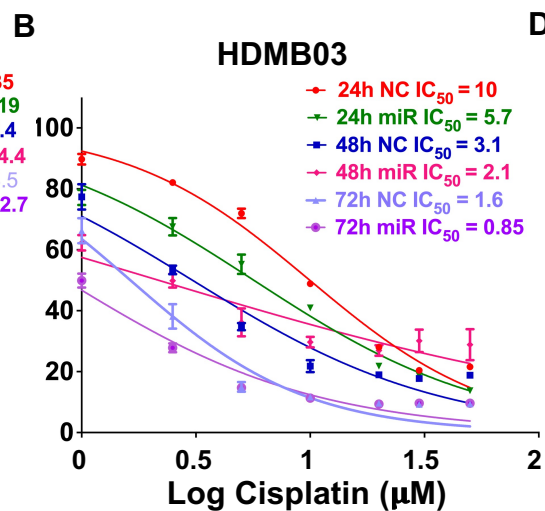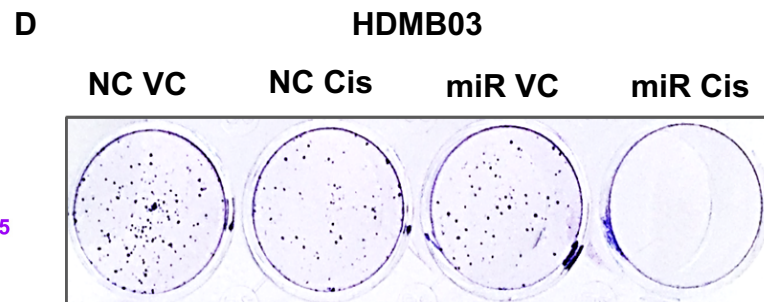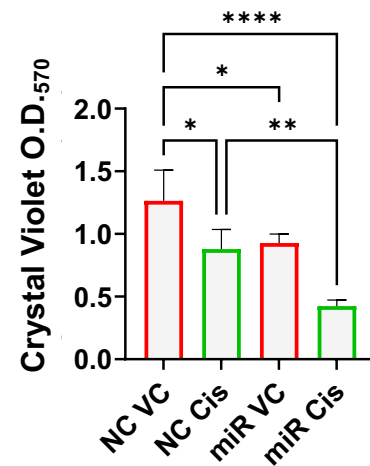

**C**

| Fold Change ( $IC_{50}$ ) | D425 | HDMB03 |
|---------------------------|------|--------|
|                           | 24h  | 1.8    |
| 48h                       | 2.1  | 1.5    |
| 72h                       | 1.7  | 1.9    |

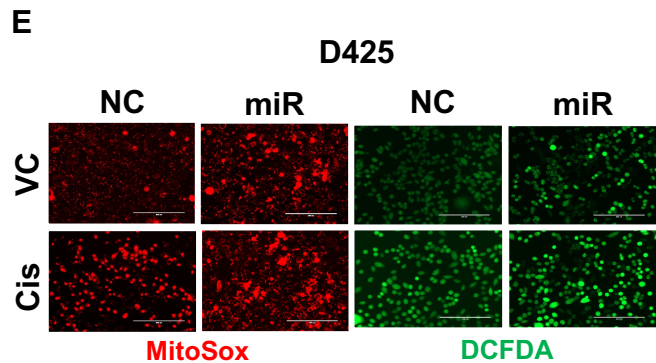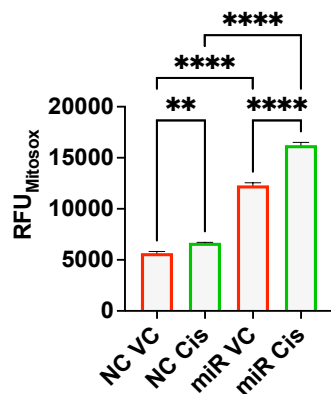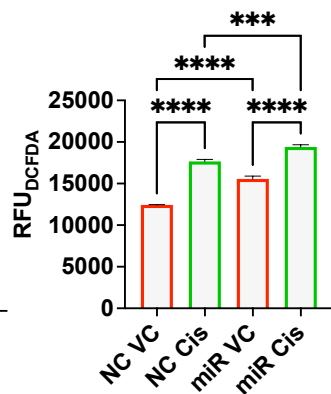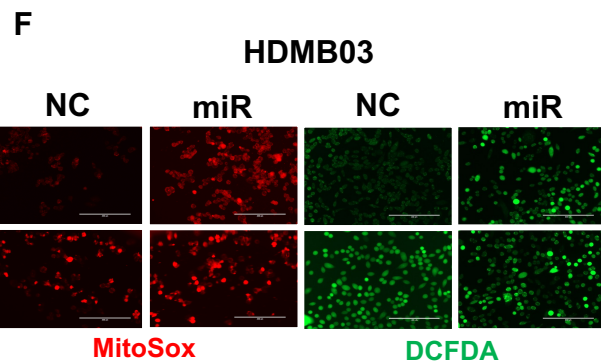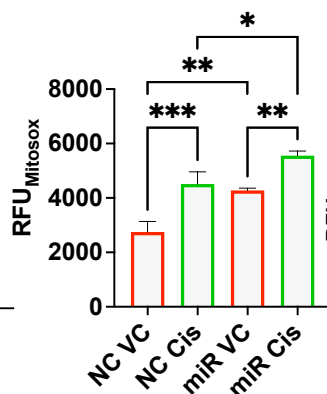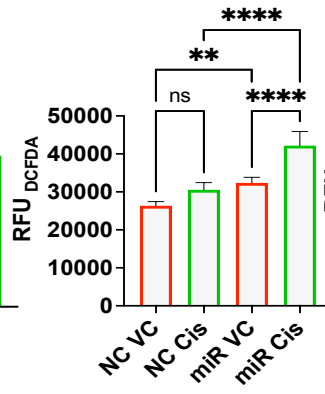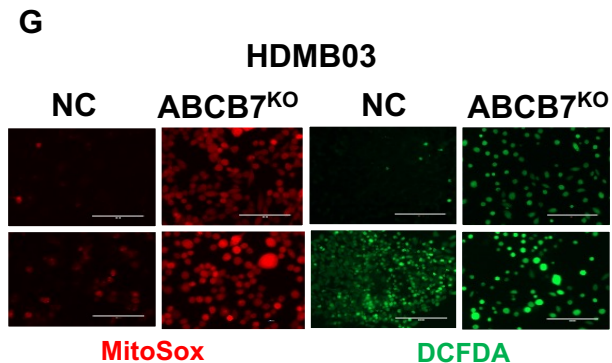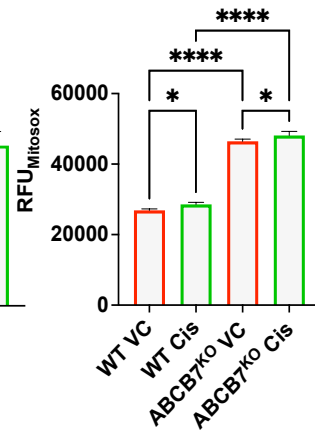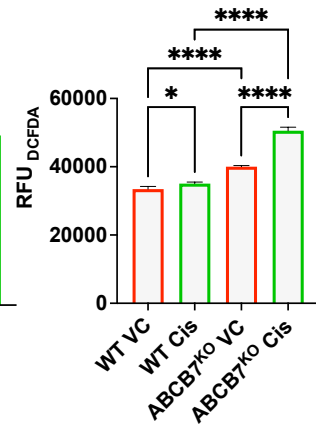

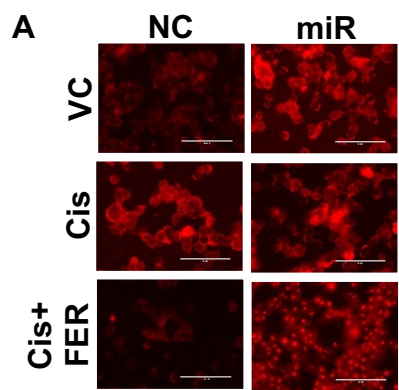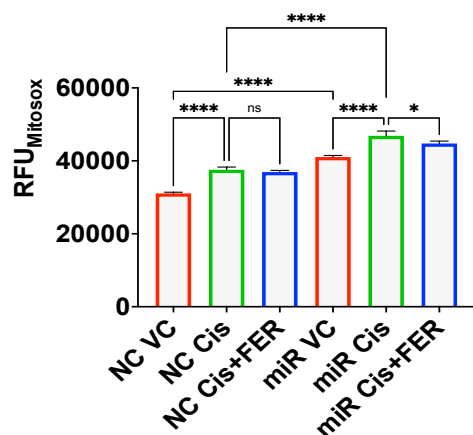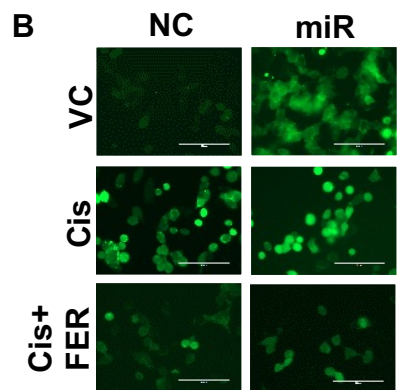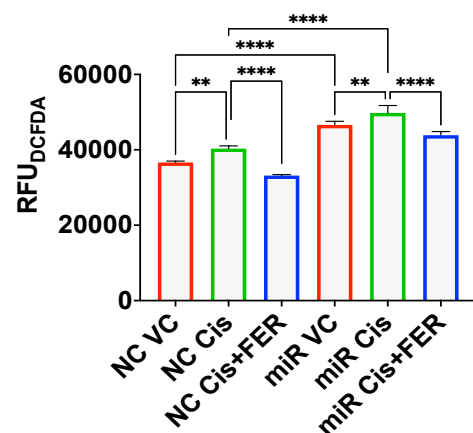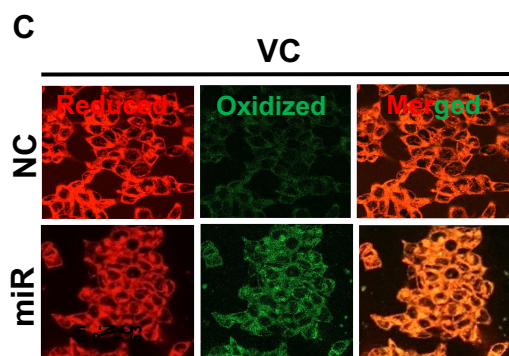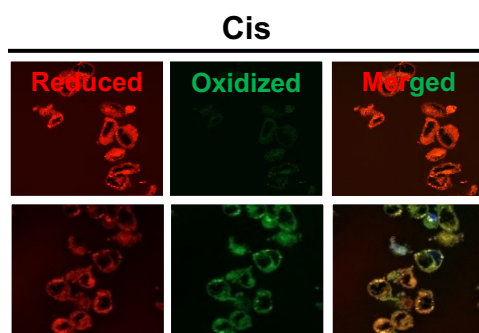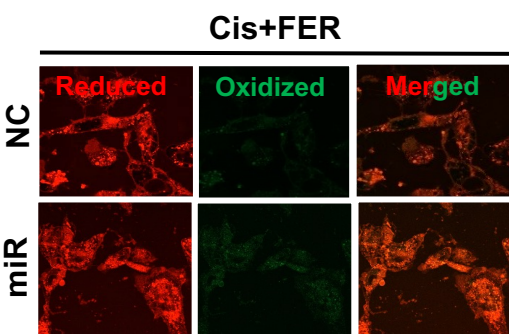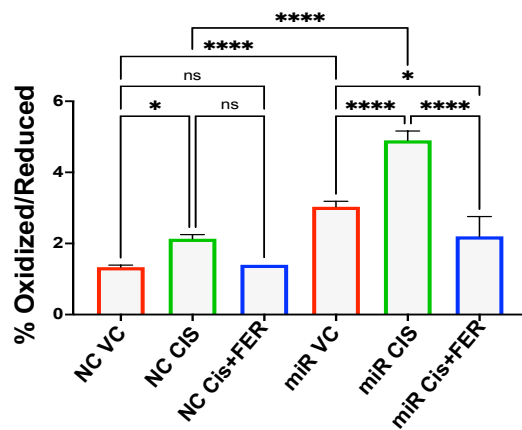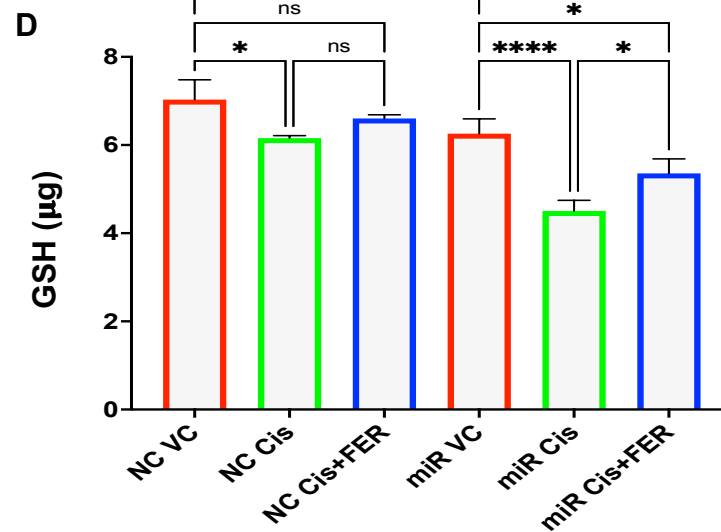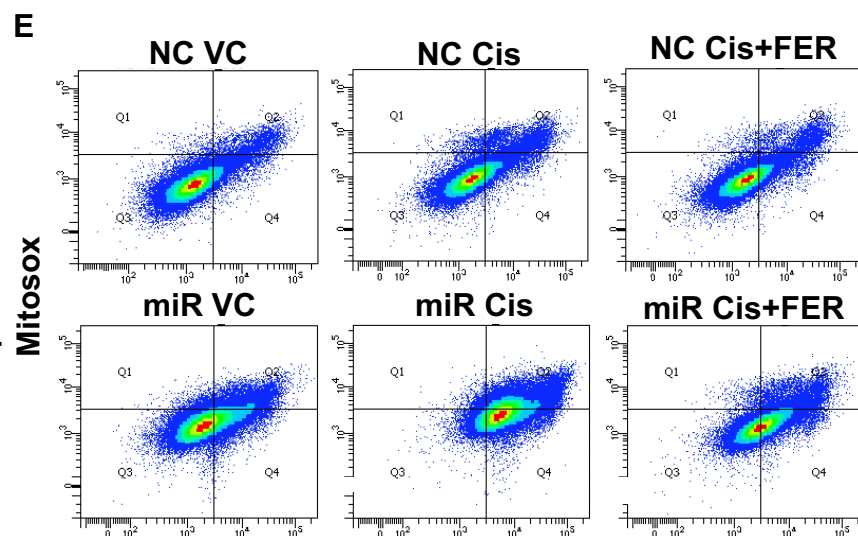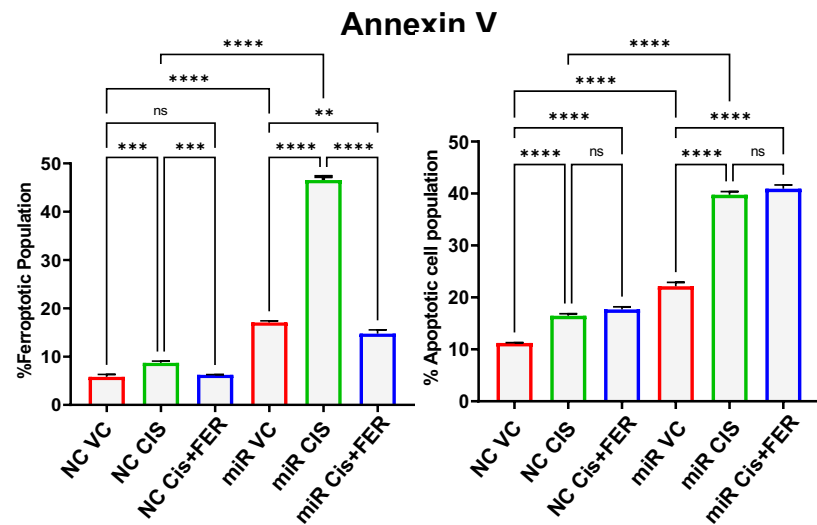

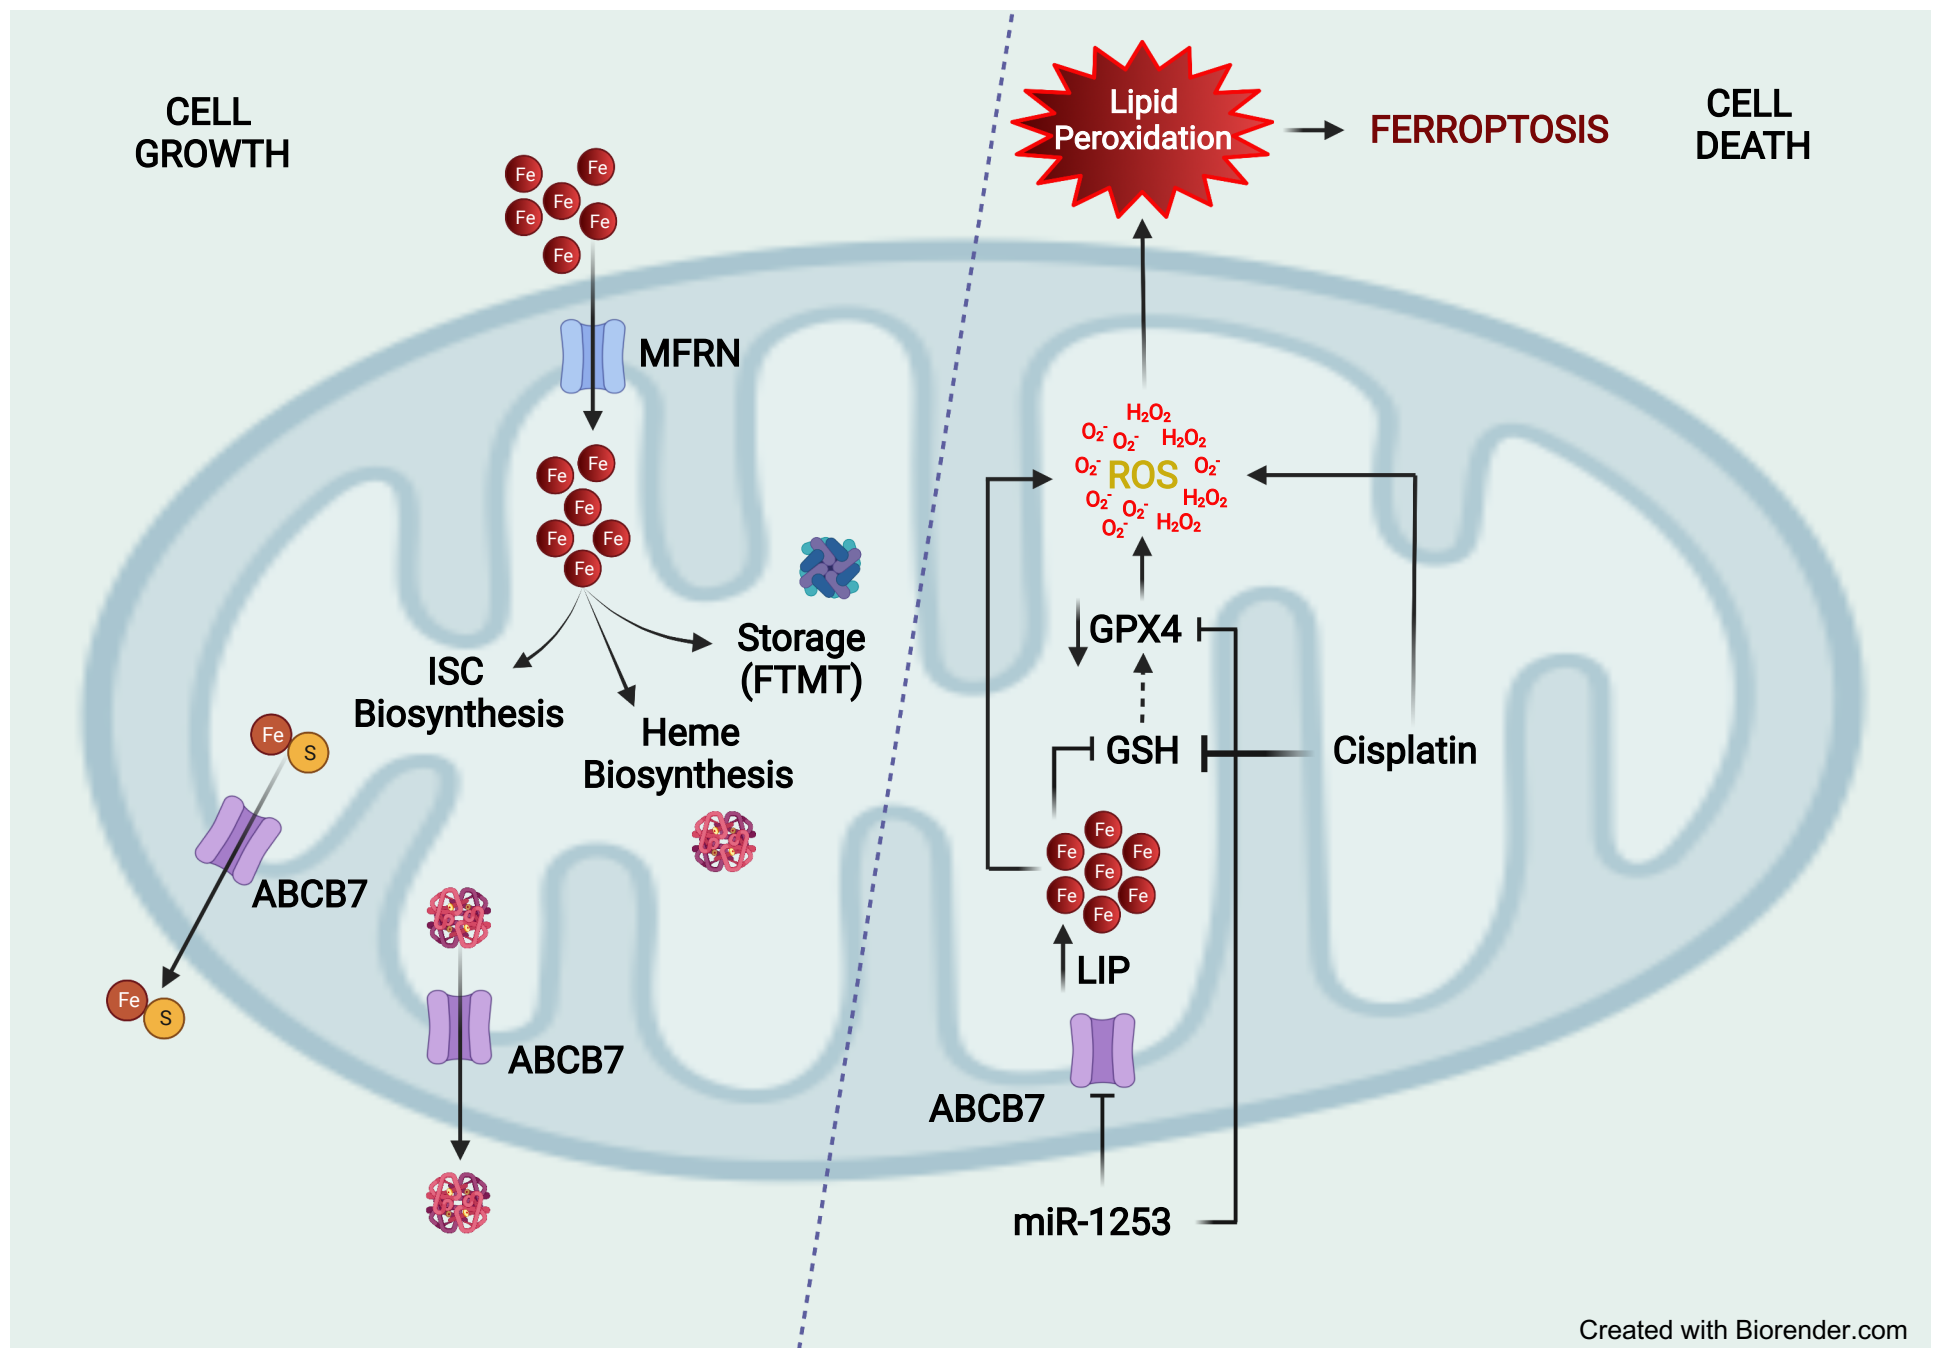

Created with Biorender.com

**Schematic representation of miR-1253-induced ferroptosis.** Under normal conditions,  $\text{Fe}^{2+}$  is imported into the mitochondria via the mitoferrin (MFRN) transporters for 3 primary purposes: i) Fe-S cluster (ISC) synthesis, ii) heme synthesis, or iii) storage as ferritin (FTMT). Fe-S clusters and heme are exported back to the cytoplasm via ABCB7 to fuel various cellular processes. In cancer, these transporters are deregulated resulting in abnormal iron transport facilitating tumor growth. Targeted inhibition of ABCB7 by miR-1253 results in generation of a labile free iron pools (LIP) resulting in elevated ROS; miR-1253 can also deplete glutathione (GSH) stores and inhibit glutathione peroxidase 4 (GPX4), a primary mitigator of ferroptosis. Cisplatin can work synergistically with miR-1253 by depleting GSH levels and inducing ROS to augment ferroptosis.
